# Supplementary material for: 2017 Reviewers and Guest Associate Editors
Source: Atypon-hosted journal article supplement (doi:10.1287/mnsc.2018.3039), 2018-02-01
Supplement: mnsc.2018.3039-sm.pdf [file mnsc.2018.3039-sm.pdf]

## 2017 – All Reviewers

Abbasi, Ahmed, University of Virginia  
Abdallah, Tarek, New York University  
Abeler, Johannes, University of Oxford  
Abhishek, Vibhanshu, Carnegie Mellon University  
Abouee-Mehrzi, Hossein, University of Waterloo  
Abraham, Mabel, Columbia University  
Abramova, Inna, Massachusetts Institute of Technology  
Acito, Andrew, Michigan State University  
Acquisti, Alessandro, Carnegie Mellon University  
Adamopoulos, Panagiotis, Emory University  
Adams, Renee, University of New South Wales  
Addoum, Jawad, Cornell University  
Adelino, Manuel, Duke University  
Adhikari, Binay, University of Alabama  
Adida, Elodie, University of California, Riverside  
Adjerid, Idris, University of Notre Dame  
Afeche, Philipp, University of Toronto  
Aflaki, Arian, Duke University  
Aflaki, Sam, HEC Paris  
Agarwal, Ashish, University of Texas at Austin  
Agarwal, Vikas, Georgia State University  
Agastya, Murali, University of Sydney  
Agca, Senay, George Washington University  
Aggarwal, Pankaj, University of Toronto  
Aggarwal, Reena, Georgetown University  
Aggarwal, Rohit, University of Utah  
Aggarwal, Vaneet, Purdue University  
Aggarwal, Vikas, INSEAD  
Agha, Leila, Dartmouth College  
Agnew, Julie, College of William and Mary  
Agranov, Marina, California Institute of Technology  
Agrawal, Anup, University of Alabama  
Agrawal, Anupam, Texas A&M University  
Agrawal, Ashwini, London School of Economics and Political Science  
Agrawal, Shipra, Columbia University  
Agrawal, Vishal, Georgetown University  
Aharonson, Barak, New York University  
Ahern, Kenneth, University of Michigan  
Ahire, Sanjay, University of South Carolina  
Ahnert, Toni, Bank of Canada  
Ai, Hengjie, University of Minnesota  
Ajlou, Amir, Massachusetts Institute of Technology  
Akamah, Herita, University of Nebraska-Lincoln  
Akan, Mustafa, Carnegie Mellon University  
Akbarpour, Mohammad, Stanford University  
Akca, Yalcin, Melbourne Business School  
Akey, Pat, University of Toronto  
Aksin, Zeynep, Koç University  
Alagoz, Oguzhan, University of Wisconsin-Madison  
Alan, Yasin, Vanderbilt University  
Albuquerque, Ana, Boston University  
Aleksi, Aaltonen, University of Warwick  
Ali, Ashiq, University of Texas at Dallas  
Alizamir, Saed, Yale University  
Allen, Eric, University of Southern California  
Almås, Ingvild, Stockholm University  
Almeida, Heitor, University of Illinois at Urbana-Champaign  
Alon, Shiri, Bar-Ilan University  
Alonso, Ricardo, London School of Economics and Political Science  
Alptekinoglu, Aydin, Pennsylvania State University  
Altinkilic, Oya, George Washington University  
Altmann, Steffen, University of Copenhagen  
Altug, Mehmet, George Washington University  
Amaldoss, Wilfred, Duke University  
Amar, Moty, Ono Academic College  
Ambuehl, Sandro, University of Toronto  
Amel-Zadeh, Amir, University of Oxford  
Amihud, Yakov, New York University  
Amir, On, University of California, San Diego  
Amore, Mario Daniele, Bocconi University  
Amromin, Gene, Federal Reserve Bank of Chicago  
An, Hyung-Chan, Yonsei University  
An, Li, Tsinghua University  
Anagol, Santosh, University of Pennsylvania  
Anand, Gopesh, University of Illinois  
Anantharaman, Divya, Rutgers University  
Andersen, Steffen, Copenhagen Business School  
Anderson, Stephen, Stanford University  
Andersson, Ola, Research Institute of Industrial Economics  
Andrade, Sandro, University of Miami  
Andrei, Daniel, University of California, Los Angeles

## 2017 – All Reviewers

Andrews, Michelle, Emory University  
Andritsos, Dimitrios, HEC Paris  
Anenberg, Elliot, Federal Reserve Board  
Anjos, Fernando, Universidade Nova de Lisboa  
Antognini, Alessandro, University of Bologna  
Antoniou, Constantinos, University of Warwick  
Aobdia, Daniel, Northwestern University  
Aouad, Ali, Massachusetts Institute of Technology  
Appel, Ian, Boston College  
Ardestani-Jaafari, Amir, McGill University  
Argon, Nilay, University of North Carolina  
Aribarg, Anocha, University of Michigan  
Arif, Salman, Indiana University  
Arikan, Mazhar, University of Kansas  
Arlotto, Alessandro, Duke University  
Armony, Mor, New York University  
Armstrong, Christopher, University of Pennsylvania  
Arnold, Marc, University of St. Gallen  
Arnosti, Nick, Stanford University  
Arts, Sam, KU Leuven  
Ascarza, Eva, Columbia University  
Ashlagi, Itai, Stanford University  
Askin, Noah, INSEAD  
Astebro, Thomas, University of Toronto  
Aswani, Anil, University of California, Berkeley  
Atahan, Pelin, Özyeğin University  
Atanassov, Julian, University of Nebraska  
Atasoy, Hilal, Temple University  
Atasu, Atalay, Georgia Institute of Technology  
Athanasoglou, Stergios, University of Milano-Bicocca  
Attema, Arthur, Erasmus University  
Audia, Pino, Dartmouth College  
Augustin, Patrick, McGill University  
Avdis, Efstathios, University of Alberta  
Aven, Brandy, Carnegie Mellon University  
Avramov, Doron, Hebrew University  
Aydin, Goker, Johns Hopkins University  
Aydogan, Ilke, Erasmus University Rotterdam  
Ayer, Turgay, Georgia Institute of Technology  
Ayton, Peter, City University London  
Ayvaci, Mehmet, University of Texas at Dallas  
Azar, Ofer, Ben-Gurion University of the Negev  
Azmat, Ghazala, Queen Mary University of London  
Baardman, Lennart, Massachusetts Institute of Technology  
Babar, Yash, University of Minnesota  
Babenko, Ilona, Arizona State University  
Babus, Ana, Federal Reserve Bank of Chicago  
Badarinza, Cristian, National University of Singapore  
Bae, Kee-Hong, York University  
Baele, Lieven, Tilburg University  
Baghai, Ramin, Stockholm school of economics  
Bagnoli, Mark, Purdue University  
Bagues, Manuel, Aalto University School of Business  
Bai, Haorui, Tsinghua University  
bai, Jennie, Georgetown University  
Bai, Ying, The Chinese University of Hong Kong  
Baillon, Aurelien, Erasmus University  
Baisa, Brian, Amherst College  
Baker, Erin, University of Massachusetts Amherst  
Baker, Scott, Northwestern University  
Bakke, Tor-Erik, University of Oklahoma  
Bakshi, Gurdip, University of Maryland, College Park  
Bakshi, Nitin, University of Utah  
Bala, Hillol, Indiana University  
Balachander, Subramanian, Purdue University  
Balafoutas, Loukas, University of Innsbruck  
Balakrishnan, Karthik, London Business School  
Balakrishnan, Ramji, University of Iowa  
Balan, David, Federal Trade Commission  
Balasubramaniam, Vimal, University of Warwick  
Baldauf, Markus, University of British Columbia  
Baldenius, Tim, New York University  
Balduzzi, Pierluigi, Boston College  
Bali, Turan, Georgetown University  
Ball, George, Indiana University  
Ball, Michael, University of Maryland, College Park  
Ball, Ryan, University of Michigan  
Baloria, Vishal, Boston College  
Balseiro, Santiago, Duke University  
Balsmeier, Benjamin, Eidgenössische Technische Hochschule Zurich Seminar für Statistik  
Bamieh, Omar, University of Vienna  
Ban, Gah-Yi, London Business School  
Bandi, Chaitanya, Northwestern University

## 2017 – All Reviewers

Banerjee, Siddhartha, Cornell University  
Bao, Jack, Federal Reserve Board  
Bao, Jiayi, University of Pennsylvania  
Bao, Zhengyang(Leo), Monash University  
Bapna, Sofia, University of Minnesota in Minneapolis  
Baptista, Alexandre, The George Washington University  
Barasch, Alixandra, University of Pennsylvania  
Barbosu, Sandra, University of Toronto  
Bardsley, Nick, University of Reading  
Barillas, Francisco, Emory University  
Barinov, Alex, University of California, Riverside  
Bar-Isaac, Heski, University of Toronto  
Barker, Vincent, University of Kansas  
Baron, Opher, University of Toronto  
Barras, Laurent, McGill University  
Barrios, John, University of Chicago  
Barron, Daniel, Northwestern University  
Barrot, Jean-Noel, Massachusetts Institute of Technology  
Barsade, Sigal, University of Pennsylvania  
Bart, Yakov, Northeastern University  
Bartling, Björn, University of Zurich  
Bartos, Vojtech, Ludwig Maximilian University of Munich  
Barzilay, Ohad, Tel Aviv University  
Bastani, Hamsa, IBM Research  
Basten, Rob , Technische Universiteit Eindhoven  
Bates, Thomas, Arizona State University  
Batt, Robert, University of Wisconsin–Madison  
Battalio, Robert , University of Notre Dame  
Baucells, Manel, University of Virginia  
Bauer, Daniel, University of Alabama  
Bauer, Michael, Federal Reserve Bank of San Francisco  
Bauer, Michal, Charles University  
Bauman, Chris, University of California, Irvine  
Baumann, Oliver, University of Southern Denmark  
Baumeister, Christiane, University of Notre Dame  
Bavafa, Hessam, University of Wisconsin-Madison  
Bayati, Mohsen, Stanford University  
Beasley, Mark, North Carolina State University  
Beatty, Anne, Ohio State University  
Becher, David, Drexel University  
Becker-Peth, Michael, University of Cologne  
Beer, Ruth, Indiana University  
Begen, Mehmet, Western University  
Begenau, Juliane, Harvard University  
Behn, Markus, European Central Bank  
Belavina, Elena, University of Chicago  
Belenzon, Sharon, Duke University  
Bell, David R., University of Pennsylvania  
Bellamy, Marcus, Boston University  
Bellemare, Charles, Université Laval  
Belo, Frederico, University of Minnesota  
Belo, Rodrigo, Erasmus University  
Bena, Jan, University of British Columbia  
Ben-David, Itzhak, Ohio State University  
Bendersky, Corinne, University of California, Los Angeles  
Bengui, Julien, University of Montreal  
Bennedsen, Morten, INSEAD  
Bennett, Victor, Duke University  
Benoit, Sylvain, Université Paris-Dauphine  
Ben-Rephael, Azi, Indiana University  
Bens, Daniel, INSEAD  
Benson, Alan, University of Minnesota  
Berchicci, Luca, Erasmus University  
Bereby-Meyer, Yoella, Ben-Gurion University of the Negev  
Berenguer, Gemma, Purdue University  
Bereskin, Frederick, University of Delaware  
Berg, Tobias, Frankfurt School of Finance & Management  
Berger, Allen, University of South Carolina  
Berger, Elizabeth, Cornell University  
Berger, Loic, IESEG School of Management  
Berger, Sebastian, University of Bern  
Bergman, Nittai, Massachusetts Institute of Technology  
Bergstresser, Daniel, Brandeis University  
Berling, Peter, Lund University  
Berman, Jonathan, London Business School  
Berman, Ron, University of Pennsylvania  
Bermiss, Sekou, University of Texas  
Bernstein, Ethan, Harvard Business School  
Bernstein, Shai, Stanford University  
Berry Jaeker, Jillian, Boston University  
Berry, Heather, University of Pennsylvania  
Bertini, Marco, ESADE Business School  
Bertomeu, Jeremy, Baruch College  
Besbes, Omar, Columbia University

## 2017 – All Reviewers

Beshears, John, Harvard Business School  
Bhanot, Syon, Swarthmore College  
Bharath, Sreedhar, Arizona State University  
Bhardwaj, Pradeep, University of Central Florida  
Bhargava, Saurabh, Carnegie Mellon University  
Bhaskaran, Sreekumar, Southern Methodist University  
Bhat, Gauri, Southern Methodist University  
Bhatia, Sudeep, University of Pennsylvania  
Bhattacharjee, Amit, Dartmouth College  
Bhattacharya, Shantanu, Lee Kong Chian School of Business  
Bhutta, Neil, Federal Reserve Board  
Bianchi, Pietro, University of Miami  
Bichler, Martin, Technical University of Munich  
Bickel, J. Eric, Texas A&M University  
Bidwell, Matthew, University of Pennsylvania  
Biggs, Max, Massachusetts Institute of Technology  
Bigio, Saki, University of California, Los Angeles  
Bigoni, Maria, University of Bologna  
Billett, Matthew, Indiana University  
Billings, Mary, New York University  
Billio, Monica, Università Ca' Foscari Venezia  
Bimpikis, Kostas, Stanford University  
Birru, Justin, Ohio State University  
Bitterly, Brad, University of Pennsylvania  
Biyalogorsky, Eyal, Interdisciplinary Center Herzliya  
Bjarnadóttir, Margrét, University of Maryland, College Park  
Black, Lamont, DePaul University  
Blankespoor, Elizabeth, Stanford University  
Blasco, Andrea, Harvard University  
Bloch, Francis, Paris School of Economics  
Board, Simon, University of California, Los Angeles  
Bockenholt, Ulf, Northeastern University  
Bockstedt, Jesse, University of Arizona  
Bodnaruk, Andriy, University of Illinois at Chicago  
Bodoh-Creed, Aaron, University of California, Berkeley  
Bodur, Merve, University of Toronto  
Boehm, Johannes, Sciences Po  
Bohnet, Iris, Harvard University  
Bollinger, Bryan, Duke University  
Bonami, Pierre, International Business Machines  
Bond, Samuel, Georgia Tech  
Bongaerts, Dion, Erasmus University  
Bonsall, Samuel, Pennsylvania State University  
Borah, Abhishek, University of Washington  
Bordalo, Pedro, University of Oxford  
Borri, Nicola, Libera Università Internazionale degli Studi Sociali Guido Carli  
Bosch-Rosa, Ciril, Colegio Universitario de Estudios Financieros  
Botelho, Tristan, Massachusetts Institute of Technology  
Bothner, Matthew, European School of Management and Technology  
Boulatov, Alex, Higher School of Economics  
Bountali, Olga, Southern Methodist University  
Bourreau, Marc, Telecom ParisTech  
Bourveau, Thomas, Hong Kong University of Science and Technology  
Bouvard, Matthieu, McGill University  
Bouwens, Jan, University of Amsterdam  
Bova, Francesco, University of Toronto  
Bowles, Hannah, Harvard University  
Boyabatli, Onur, Singapore Management University  
Boyaci, Tamer, McGill University  
Boyarchenko, Nina, Federal Reserve Bank of New York  
Boyer, Brian, Brigham Young University  
Bracha, Anat, The Federal Reserve Bank of Boston  
Bradlow, Eric, University of Pennsylvania  
Braguinsky, Serguey, University of Maryland, College Park  
Branas-Garza, Pablo, Middlesex University  
Brandes, Leif, University of Warwick  
Brandimarte, Laura, University of Arizona  
Brandon, Alec, University of Chicago  
Brandts, Jordi, Barcelona Graduate School of Economics  
Branger, Nicole, University of Muenster  
Branstetter, Lee, Carnegie Mellon University  
Britten, Brian, University of Kentucky  
Braun, Alexander, University of St. Gallen  
Braun, Michael, Southern Methodist University  
Bravo, Fernanda, University of California, Los Angeles

## 2017 – All Reviewers

Bray, Robert, Northwestern University  
Brenner, Lyle, University of Florida  
Brochet, Francois, Boston University  
Brockman, Paul, Lehigh University  
Brogaard, Jonathan, University of Washington  
Brooks, Alison, University of Pennsylvania  
Brown, Alexander, Texas A&M University  
Brown, Craig, Northeastern University  
Brown, David, Duke University  
Brown, James, Iowa State University  
Brown, Jennifer, University of British Columbia  
Brown, Jenny, Arizona State University  
Brown, Martin, University of St. Gallen  
Brownback, Andy, University of Arkansas  
Browne, Glenn, Texas Tech University  
Bruhin, Adrian, University of Lausanne  
Bryan, Kevin, University of Toronto  
Bryzgalova, Svetlana, Stanford University  
Buccioli, Alessandro, University of Verona  
Bucks, Brian, Consumer Financial Protection Bureau  
Buell, Ryan, Harvard Business School  
Buffa, Andrea, Boston University  
Bulte, Erwin, Wageningen University  
Bunker Whittington, Kjersten, Reed College  
Bünstorf, Guido, University of Kassel  
Buraschi, Andrea, Imperial College London  
Burbano, Vanessa, Columbia University  
Bursztyn, Leonardo, University of Chicago  
Burtch, Gordon, University of Minnesota  
Buser, Thomas, University of Amsterdam  
Buss, Adrian, INSEAD  
Busse, Meghan, Northwestern University  
Bustamante, Maria, University of Maryland, College Park  
Butera, Luigi, George Mason University  
Butler, John, University of Texas  
Byoun, Soku, Baylor University  
Byzalov, Dmitri, Temple University  
Cacho-Diaz, Julio, Quantor Capital LLC  
Cachon, Gerard, University of Pennsylvania  
Cadman, Brian, University of Utah  
Cadsby, C. Bram, University of Guelph  
Cai, Cexun, Texas A&M University  
Cai, Gangshu, Santa Clara University  
Cai, Jian, Washington University in Saint Louis  
Cai, Ye, Santa Clara University  
Cain, Daylian, Yale University  
Caldentey, Rene, The University of Chicago  
Caldieraro, Fabio, Brazilian School of Public and Business Administration  
Call, Andrew, Arizona State University  
Calvano, Emilio, Center for Studies in Economics and Finance  
Campbell, Arthur, Monash University  
Campbell, Benjamin, Ohio State University  
Campos de Xavier Pinto, Christine, Sao Paulo School of Economics  
Candogan, Ozan, University of Chicago  
Cao, Huining, Cheung Kong Graduate School of Business  
Cao, Zike, Erasmus University  
Caplin, Andrew, New York University  
Carballo, Jeronimo, University of Colorado at Boulder  
Care, Algo, Centrum Wiskunde en Informatica  
Carnabuci, Gianluca, European School of Management and Technology  
Carnahan, Seth, University of Michigan  
Caro, Felipe, University of California, Los Angeles  
Carstensen, Kai, Christian-Albrechts-Universitat zu Kiel  
Cartea, Alvaro, University of Oxford  
Carter, Mary, Boston College  
Carton, Andrew, University of Pennsylvania  
Caruso, Eugene, The University of Chicago  
Carvalho, Daniel, University of Southern California  
Casamatta, Catherine, Toulouse 1 University Capitole  
Casey, Marcus, University of Illinois at Chicago  
Caskey, Judson, University of California, Los Angeles  
Cason, Timothy, Purdue University  
Castiglionesi, Fabio, Tilburg University  
Castillo, Marco, Texas A&M University  
Catalini, Christian, Massachusetts Institute of Technology  
Cattani, Gino, New York University  
Ceccagnoli, Marco, Georgia Institute of Technology  
Cederburg, Scott, University of Arizona  
Celerier, Claire, University of Toronto  
Cen, Ling, University of Toronto  
Ceran, Yasin, Santa Clara University

## 2017 – All Reviewers

Cettolin, Elena, Tilburg University  
Chabakauri, Georgy, London School of Economics and Political Science  
Chabi-Yo, Fousseni, Fisher College of Business  
Chadwick, Clint, University of Kansas  
Chai, Sen, ESSEC Business School  
Chakraborty, Anujit, University of California, Davis  
Chalfin, Aaron, University of Pennsylvania  
Chan, Carri, Columbia University  
Chan, Frank, ESSEC Business School  
Chan, Jason, University of Minnesota in Minneapolis  
Chan, Timothy, University of Toronto  
Chandon, Pierre, INSEAD  
Chandrasekaran, Aravind, The Ohio State University  
Chang, Daphne, University of Michigan  
Chang, Edward, University of Pennsylvania  
Chang, Eric, The University of Hong Kong  
Chang, Xin, University of Cambridge  
Chan-Serafin, Suzanne, University of New South Wales  
Chao, Matthew, Williams College  
Charness, Gary, University of California, Santa Barbara  
Chauvin, Jasmina, Harvard Business School  
Chava, Sudheer, Georgia Institute of Technology  
Chaxel, Anne-Sophie, Virginia Tech  
Chemla, Gilles, Imperial College London  
Chemmanur, Thomas, Boston College  
Chen, Adela, Nanyang Technological University  
Chen, Boxiao, University of Michigan  
Chen, Ciao-Wei, University of Illinois at Urbana-Champaign  
Chen, Clara, University of Illinois at Urbana-Champaign  
Chen, David, University of Minnesota  
Chen, Eva, Fordham University  
Chen, Fangruo, Columbia University  
Chen, Guoli, INSEAD  
Chen, Hailiang, City University of Hong Kong  
Chen, Hsuan-Chi, University of New Mexico  
Chen, Hua, University of Georgia  
Chen, Huangyu, Boston University  
Chen, Jason, Tsinghua University  
Chen, Jianqing, The University of Texas at Dallas  
Chen, Jingnan, University of Exeter  
Chen, Joseph, University of California, Davis  
Chen, Kay-Yut, University of Texas at Arlington  
Chen, Li, Cornell University  
Chen, Li-Wei, Emory University  
Chen, Long, George Mason University  
Chen, Ningyuan, Hong Kong University of Science and Technology  
Chen, Po-Chang, Miami University  
Chen, Qi (George), University of Michigan  
Chen, Rachel, University of California, Davis  
Chen, Ren-Raw, Fordham University  
Chen, Roy, University of Michigan  
Chen, Shi, University of Washington  
Chen, Shuping, University of Texas at Austin  
Chen, Wei, University of Arizona  
Chen, Xi, New York University  
Chen, Xi, Virginia Polytechnic Institute and State University  
Chen, Xia, Singapore Management University  
Chen, Yi, Nanyang Technological University  
Chen, Yiling, Harvard University  
Chen, Ying-Ju, Hong Kong University of Science and Technology  
Chen, Yiwei, Singapore University of Technology and Design  
Chen, Yong, Texas A&M University  
Chen, Yuanyuan, University of Alabama  
Chen, Zhi, INSEAD Asia Campus  
Chen, Zhi-Long, University of Maryland, College Park  
Chen, Zhiyao, Chinese University of Hong Kong  
Chen, Zhuo, Tsinghua University  
Cheng, Ing-Haw, Dartmouth College  
Cheng, Jiuqing, College of William and Mary  
Cheng, Qiang, Singapore Management University  
Cheng, Russell, University of Southampton  
Cheng, Yingmei, Florida State University  
Cheng, Yo-Jud, Harvard Business School  
Cheung, Wang Chi, Institute of High Performance Computing  
Cheynel, Edwige, University of California, San Diego  
Chhaochharia, Vidhi, university of miami  
Chin, Michael, Rutgers University  
Chinco, Alex, University of Illinois Urbana-Champaign  
Chiou, Lesley, Occidental College

## 2017 – All Reviewers

Chioveanu, Ioana, Brunel University  
Cho, Soo-Haeng, Carnegie Mellon University  
Cho, Thummim, London School of Economics and Political Science  
Chod, Jiri, Boston College  
Choi, Darwin, Chinese University of Hong Kong Faculty  
Choi, Jaewon, University of Illinois at Urbana-Champaign  
Choi, James, Yale University  
Choi, Nicole, University of Wyoming  
Choi, Willie, University of Pittsburgh  
Chordia, Tarun, Emory University  
Choudhary, Vivek, INSEAD Asia Campus  
Choudhury, Prithwiraj, Harvard Business School  
Christelis, Dimitris, European Central Bank  
Christensen, Dane, University of Oregon  
Christensen, Hans, University of Chicago  
Christoffersen, Peter, University of Toronto  
Chu, Junhong, NUS Business School  
Chu, Leon, University of Southern California  
Chu, Yongqiang, University of South Carolina  
Chuan, Amanda, University of Pennsylvania  
Chui, Andy, Hong Kong Polytechnic University  
Chun, Albert, Rensselaer Polytechnic Institute  
Chun, So Yeon, Georgetown University  
Chung, Byung, Nanyang Technological University  
Chung, Dennis, Simon Fraser University  
Chung, Doug, Harvard Business School  
Chung, Kevin, University of Wisconsin-Madison  
Cialenco, Igor, Illinois Institute of Technology  
Ciciretti, Rocco, University of Rome Tor Vergata  
Cil, Eren, University of Oregon  
Ciocan, Florin, Massachusetts Institute of Technology  
Clark, Jonathan, Pennsylvania State University  
Clark-Joseph, Adam, University of Illinois Urbana-Champaign  
Clement, Michael, University of Texas at Austin  
Clifford, Chris, University of Kentucky  
Coates, John, Harvard University  
Cobb, Adam, University of Pennsylvania  
Cocco, Joao, London Business School  
Cockburn, Iain, Boston University  
Coffman, Lucas, Ohio State University  
Cohen, Daniel, University of Texas at Dallas  
Cohen, Lisa, McGill University  
Cohen, Maxime, New York University  
Cohn, Alain, University of Chicago  
Cohn, Jonathan, University of Texas at Austin  
Colak, Ahmet, Clemson University  
Coleman, Nicholas, Federal Reserve Board  
Coles, Jeffrey, University of Utah  
Colla, Paolo, Bocconi University  
Collard, Fabrice, university of bern  
Colliard, Jean-Edouard, HEC Paris  
Colombo, Luca, Universita Cattolica del Sacro Cuore  
Colombo, Massimo, Politecnico di Milano  
Compeau, Deborah, Washington State University  
Condie, Scott, Brigham Young University  
Cong, Will, University of Chicago  
Conlon, Chris, New York University  
Cont, Rama, Imperial College London  
Conti, Annamaria, Georgia Tech  
Conti, Raffaele, Católica Lisbon  
Contreras, Jorge, university of utah  
Converse, Benjamin, University of Virginia  
Cookson, J. Anthony, University of Colorado at Boulder  
Cooper, David, Florida State University  
Cooper, Michael, University of Utah  
Cooper, Ryan, University of Maryland, College Park  
Corgnet, Brice, EMLYON Business School  
Cornaggia, Jess, Georgetown University  
Corona, Carlos, University of Texas at Austin  
Corrado, Carol, The Conference Board  
Correa, Ricardo, Federal Reserve Board  
Correia, Maria, London School of Economics and Political Science  
Corsi, Fulvio, Ca' Foscari University of Venice  
Coviello, Decio, HEC Montreal  
Cowen, Amanda, University of Virginia  
Cowgill, Bo, Columbia University  
Craig, Ashley, Harvard University  
Craig, Nathan, The Ohio State University  
Crama, Pascale, Singapore Management University  
Crawford, Steve, Rice University  
Creal, Drew, University of Chicago  
Cremers, Martijn, University of Notre Dame  
Crescenzi, Riccardo, London School of Economics and Political Science

## 2017 – All Reviewers

Crilly, Donal, London Business School  
Critchler, Clayton, University of California, Berkeley  
Crowston, Kevin, Syracuse University  
Cryder, Cynthia, Washington University in St. Louis  
Csaszar, Felipe, University of Michigan  
Cubitt, Robin, University of Nottingham  
Cui, Ruomeng, Emory University  
Cui, Shiliang, Georgetown University  
Cui, Tony Haitao, University of Minnesota  
Cui, Victor, University of Manitoba  
Cui, Yao, Cornell University  
Cujean, Julien, University of Maryland, College Park  
Cullen, Zoe, Harvard Business School  
Cunat, Vicente, London School of Economics and Political Science  
Curtis, Asher, University of Washington  
Custodio, Claudia, Imperial College London  
Cusumano, Michael, Massachusetts Institute of Technology  
Cvijanovic, Dragana, University of North Carolina at Chapel Hill  
da Matta, Rafael, University of Amsterdam  
Da, Zhi, University of Notre Dame  
Dahiya, Sandeep, Georgetown University  
Dahl, Michael S., Aarhus University  
Dahlander, Linus, European School of Management and Technology  
Dai, Hengchen, Washington University in Saint Louis  
Dai, Min, National University of Singapore  
Dai, Tinglong, Johns Hopkins University  
Dai, Zhonglan, University of Texas at Dallas  
Daley, Brendan, Duke University  
Dambra, Michael, University at Buffalo - The State University of New York  
Dana, Jason, Yale University  
Danaher, Brett, Chapman University  
Daniel, Sherae, University of Cincinnati  
Daniels, Kaitlin, Washington University in St. Louis  
Danilov, Anastasia, University of Cologne  
Das, Sanjiv, Santa Clara University  
Dasgupta, Amil, London School of Economics and Political Science  
Dasgupta, Sudipto, Lancaster University  
Dass, Nishant, Georgia Institute of Technology  
Datta, Hannes, Tilburg University  
Davies, Shaun, Colorado University  
Davilla, Antonio, IESE Business School  
Davis, Andrew, Cornell University  
Davis, Douglas, Virginia Commonwealth University  
Dawande, Milind, University of Texas at Dallas  
Day, Robert, University of Connecticut  
De Corniere, Alexandre, Toulouse School of Economics  
de Corniere, Alexandre, University of Oxford  
de Fontenay, Catherine, University of Melbourne  
De Franco, Gus, Tulane University  
De Giorgi, Enrico, University of St. Gallen  
de Haan, Thomas, Norges Handelshoyskole  
de Jong, Abe, Erasmus University  
de los Santos, Babur, Clemson University  
de Meza, David, London School of Economics and Political Science  
de Motta, Adolfo, McGill University  
de Quidt, Jon, Stockholm University  
de Ruiters, Frans, Tilburg University  
De Simone, Lisa, Stanford University  
Dean, Mark, Columbia University  
DeAngelo, Gregory, West Virginia University  
Debo, Laurens, Dartmouth College  
Deck, Cary, University of Arkansas  
DeCroix, Gregory, University of Wisconsin--Madison  
DeFusco, Anthony, Northwestern University  
Degryse, Hans, Tilburg University  
deHaan, Ed, Stanford University  
Dekker, Henri, Vrije Universiteit  
Delfgaauw, Josse, Erasmus University Rotterdam  
Della Posta, Daniel, Cornell University  
Dell'Ariccia, Giovanni, International Monetary Fund  
Deltas, George, University of Illinois, Urbana-Champaign  
Demerjian, Peter, University of Washington  
Demers, Elizabeth, University of Virginia  
DeMiguel, Victor, London Business School  
Demiral, Elif, George Mason University  
Demirezen, Emre, University of Florida  
Demiroglu, Cem, Koç University

## 2017 – All Reviewers

Demirtas, Ozgur, Sabanci University  
den Boer, Arnoud, university of amsterdam  
Deng, Yongheng, National University of Singapore  
Deo, Sarang, Indian School of Business  
Derdenger, Timothy, Carnegie Mellon University  
Derrien, François, HEC Paris  
Desir, Antoine, Columbia University  
Desiraju, Ramarao, University of Central Florida  
Dessaint, Olivier, University of Toronto  
Devalkar, Sripad, Indian School of Business  
Dey, Aiysha, University of Minnesota  
Dhar, Tirtha, University of Guelph  
Dhawan, Rajeev, Georgia State University  
Dhillon, Paramveer, Massachusetts Institute of Technology  
Dholakia, Utpal, Rice University  
Di Lorenzo, Francesco, Copenhagen Business School  
DiBenigno, Julia, Yale University  
Dickerson, John, Carnegie Mellon University  
Dickinson, David, Appalachian State University  
Dick-Nielsen, Jens, Copenhagen Business School  
Diecidue, Enrico, INSEAD  
Dierynck, Bart, Tilburg University  
Dietvorst, Berkeley, University of Chicago  
Dillenberger, David, University of Pennsylvania  
Dimitrov, Valentin, Rutgers University  
Dimmock, Stephen, Nanyang Technological University  
Dinc, Serdar, Rutgers University  
Ding, Waverly, University of Maryland, College Park  
Ding, Xin, University of Houston  
Ding, Yichuan, University of British Columbia  
Dobrev, Stanislav, University of Wisconsin-Milwaukee  
Doering, Laura, University of Toronto  
Doerrenberg, Philipp, Centre for European Economic Research  
Doidge, Craig, University of Toronto  
Donangelo, Andres, University of Texas at Austin  
Donelson, Dain, University of Texas  
Dong, Jing, Columbia University  
Dong, Ming, York University  
Doran, Kirk, University of Notre Dame  
Dorobantu, Sinziana, New York University  
Dou, Yifan, Fudan University  
Dou, Yiwei, New York University  
Dougal, Casey, Drexel University  
Doval, Laura, California Institute of Technology  
Dover, Yaniv, Hebrew University of Jerusalem  
Drake, David, INSEAD  
Drakopoulos, Kimon, University of Southern California  
Driscoll, John, Federal Reserve Board  
Drouvelis, Michalis, University of Birmingham  
Du, Du, City University of Hong Kong  
Du, Kui, University of Massachusetts Boston  
Du, Rex, University of Houston  
Duan, Jason, University of Texas at Austin  
Duan, Wenjing, George Washington University  
Duca, John, Federal Reserve Bank of Dallas  
Duchin, Ran, University of Washington  
Duellman, Scott, Saint Louis University  
Duersch, Peter, University of Heidelberg  
Dufwenberg, Martin, University of Arizona  
Dugast, Jérôme, Bank of France  
Dukes, Anthony, University of Southern California  
Dunn, Brian, University of Oklahoma  
Dunn, Jennifer, Michigan State University  
Dur, Robert, Erasmus University Rotterdam  
Durnev, Artem, University of Iowa  
Dutcher, Glenn, Ohio University  
Dutt, Nilanjana, Bocconi University  
Dutta, Kaushik, University of South Florida  
Dworczak, Piotr, University of Chicago  
Dyer, James, University of Texas at Austin  
Dyreg, Scott, Duke University  
Dzyabura, Daria, New York University  
Ebbes, Peter, HEC Paris  
Ebert, Sebastian, Frankfurt School of Finance & Management  
Eckel, Catherine, Texas A&M University  
Eckhardt, Jonathan, University of Wisconsin--Madison  
Eckles, Dean, Facebook  
Edelman, Ben, Harvard Business School  
Ederer, Florian, Yale University  
Edwards, Alexander, University of Toronto  
Eesley, Charles, Stanford University  
Eftekhari, Mahyar, Arizona State University  
Eggers, J.P., New York University  
Ehling, Paul, BI Norwegian Business School

## 2017 – All Reviewers

Ehrgott, Matthias, Lancaster University  
Eiling, Esther, University of Amsterdam  
Eisdorfer, Assaf, University of Connecticut  
Ekici, Ali, Ozyegin University  
Ekström, Mathias, Norwegian School of Economics  
Elfenbein, Daniel, Washington University in St. Louis  
Eliaz, Kfir, Tel Aviv University  
Elkamhi, Redouane, University of Toronto  
Ellickson, Paul, University of Rochester  
Ellingsen, Tore, Stockholm School of Economics  
Ellman, Matthew, Institut d'Analisi Economica  
Ellul, Andrew, Indiana University  
Elmachtoub, Adam, Columbia University  
Elsinger, Helmut, Oesterreichische Nationalbank  
Elul, Ronel, Federal Reserve Bank of Philadelphia  
Emadi, Seyed M., North Carolina University at Chapel Hill  
Embrey, Matthew, Maastricht University  
Emmerling, Johannes, Fondazione Eni Enrico Mattei  
Engl, Florian, University of Cologne  
Englmaier, Florian, University Würzburg  
Enke, Benjamin, University of Bonn  
Erat, Sanjiv, University of California at San Diego  
Erenay, Fatih, University of Waterloo  
Erev, Ido, Technion  
Ericson, Keith, Boston University  
Ericsson, Jan, McGill University  
Eriksson, Tor, Aarhus School of Business  
Erkens, David, Georgetown University  
Ermolov, Andrey, Fordham University  
Erner, Carsten, University of California, Los Angeles  
Ert, Eyal, Hebrew University of Jerusalem  
Ertac, Seda, Koç University  
Ertekin, Necati, Santa Clara University  
Escanciano, Juan Carlos, Indiana University  
Esenduran, Gökçe, Purdue University  
Espinosa, Miguel, Pompeu Fabra University  
Esteves-Sorenson, Constanca, Yale University  
Evans, John, University of Pittsburgh  
Evers, Ellen, University of California, Berkeley  
Ewens, Michael, Carnegie Mellon University  
Exley, Christine, Harvard Business School  
Fagereng, Andreas, Statistics Norway  
Fahlenbrach, Rudiger, Ecole Polytechnique Federale de Lausanne  
Fairlie, Robert, University of California, Santa Cruz  
Falch, Ranveig, Norges Handelshoyskole  
Fan, Ming, University of Washington  
Fan, Qintao, University of Oregon  
Fan, Yuyu, Fordham University  
Fang, Christina, New York University  
Fang, Lily, INSEAD  
Fang, Vivian, University of Minnesota  
Fang, Xiao, University of Delaware  
Fang, Xin, Singapore Management University  
Farahat, Amr, Washington University in St. Louis  
Faravelli, Marco, University of Queensland  
Farias, Vivek, Massachusetts Institute of Technology  
Farre-Mensa, Joan, Harvard University  
Farronato, Chiara, Harvard Business School  
Fast, Nathanael, University of Southern California  
Faurel, Lucile, Arizona State University  
Fauver, Larry, University of Tennessee  
Favilukis, Jack, London School of Economics and Political Science  
Fay, Scott, Syracuse University  
Fee, C Edward, Tulane University  
Fehder, Daniel, Massachusetts Institute of Technology  
Fehr-Duda, Helga, ETH Zurich  
Feiler, Daniel, Dartmouth College  
Feinstein, Zachary, Washington University in St. Louis  
Feldman, Emilie, University of Pennsylvania  
Feldman, Jacob, Washington University  
Feldman, Pnina, University of California, Berkeley  
Feltovich, Nick, Monash University  
Feltz, Deborah, Michigan State University  
Feng, Juan, City University of Hong Kong  
Feng, Mei, University of Pittsburgh  
Feng, Qi (Annabelle), Purdue University  
Fenton-O'Creevy, Mark, Open University  
Ferguson, John-Paul, Stanford University  
Ferguson, Mark, University of South Carolina  
Fernandez, Roberto, Massachusetts Institute of Technology

## 2017 – All Reviewers

Fernando, Duarte, Federal Reserve Bank New York  
Ferreira, Kris, Harvard Business School  
Ferreira, Pedro, Carnegie Mellon University  
Ferri, Fabrizio, Columbia University  
Fiala, Nathan, University of Connecticut  
Fiedler, Susann, MPI for Collective Goods  
Files, Rebecca, The University of Texas at Dallas  
Filippin, Antonio, University of Milan  
Filistrucchi, Lapo, University of Florence  
filiz-ozbay, emil, University of Maryland, College Park  
Fischetti, Matteo, University of Padova  
Flammer, Caroline, Boston University  
Fleming, Michael, Federal Reserve Bank of New York  
Flory, Jeffrey, Claremont McKenna College  
Floyd, Eric, Rice University  
Follmi-Heusi, Franziska, TWI  
Folsom, David, University of Texas at El Paso  
Fong, Duncan, Pennsylvania State University  
Fong, Nathan, Temple University  
Fons-Rosen, Christian, Pompeu Fabra University  
Fontaine, Pirmin, Technical University of Munich  
Forbes, Silke, Case Western Reserve University  
Fos, Vyacheslav, Boston College  
Fosgaard, Toke, Copenhagen University  
Fosgerau, Mogens, Technical University of Denmark  
Foster, Kenneth, Dalhousie University  
Fotak, Veljko, State University of New York at Buffalo  
Fox, Jeremy, Rice University  
Fracassi, Cesare, University of Texas at Austin  
Fradkin, Andrey, Massachusetts Institute of Technology  
Frake, Justin, University of Maryland, College Park  
Francis, Bill, Rensselaer Polytechnic Institute  
Franco, April, University of Toronto  
Frank, Murray, University of Minnesota  
Franzoni, Chiara, Politecnico di Milano  
Franzoni, Francesco, Universita' della Svizzera Italiana  
Frederick, Shane, Yale University  
Freedman, Seth, Indiana University  
Freeman, Michael, INSEAD

Fresard, Laurent, University of Maryland, College Park  
Friebel, Guido, Goethe University Frankfurt  
Friedman, Henry, University of California, Los Angeles  
Frydman, Carola, Boston University  
Frydman, Cary, University of Southern California  
Fu, Fangjian, Singapore Management University  
Fu, Qiang, National University of Singapore  
Fuh, Cheng-Der, National Central University  
Fuller, Kathleen, University of Mississippi  
Funk, Russell, University of Minnesota  
Furman, Jeff, Boston University  
Fusari, Nicola, Johns Hopkins University  
Gaba, Anil, INSEAD  
Gaddis, S. Michael, Pennsylvania State University  
Gaertig, Celia, University of Pennsylvania  
Gagliarducci, Stefano, University of Rome Tor Vergata  
Gal, David, Northwestern University  
Gala, Vito, University of Pennsylvania  
Galak, Jeff, Carnegie Mellon University  
Galasso, Alberto, University of Toronto  
Galbreth, Michael, University of South Carolina  
Galeotti, Fabio, University of Lyon  
Gallagher, Justin, Case Western Reserve University  
Gallani, Susanna, Harvard Business School  
Galletta, Dennis, University of Pittsburgh  
Gallino, Santiago, Dartmouth College  
Gallmeyer, Michael, McIntire School of Commerce  
Gallo, Edoardo, University of Cambridge  
Gallus, Jana, University of California, Los Angeles  
Gambardella, Alfonso, Bocconi University  
Gan, Jie, Cheung Kong Graduate School of Business  
Ganco, Martin, University of Wisconsin-Madison  
Ganglmair, Bernhard, University of Texas at Dallas  
Ganguli, Ina, University of Massachusetts Amherst  
Gangwar, Manish, Indian School of Business  
Ganju, Kartik, McGill University

## 2017 – All Reviewers

Gantchev, Nickolay, Southern Methodist University  
Gao, Fei, Indiana University Bloomington  
Gao, Huasheng, Nanyang Technological University  
Gao, Pengjie, University of Notre Dame  
Garcia, Diego, University of North Carolina at Chapel Hill  
Garcia, Stephen, University of Michigan-Ann Arbor  
García-Canal, Esteban, University of Oviedo  
Gardete, Pedro, Stanford University  
Garfinkel, Jon, University of Iowa  
Garg, Rajiv, University of Texas at Austin  
Garlappi, Lorenzo, University of British Columbia  
Garmaise, Mark, University of California, Los Angeles  
Gartenberg, Claudine, New York University  
Gärtner, Manja, Linköping University  
Gaspar, Jose Miguel, ESSEC Business School  
Gatchev, Vladimir, University of Central Florida  
Ge, Weili, University of Washington  
Gebeyehu, Haimanot, Miami University  
Gee, Laura, Tufts University  
Geng, Qin, Kutztown University of Pennsylvania  
Geng, Xianjun, The University of Texas at Dallas  
George, Lisa, Hunter College  
Georgiadis, George, Boston University  
Gerakos, Joseph, Dartmouth College  
Germann, Frank, University of Notre Dame  
Geunes, Joseph, University of Florida  
Geva, Tomer, Tel Aviv University  
Geylani, Tansev, University of Pittsburgh  
Ghasemkhani, Hossein, Purdue University  
Ghate, Archis, University of Washington  
Ghosh, Alope, Baruch College  
Ghosh, Soumyadip, IBM Research  
Ghoshal, Abhijeet, University of Texas at Dallas  
Ghysels, Eric, University of North Carolina at Chapel Hill  
Giambona, Erasmo, Syracuse University  
Giammarino, Ronald, University of British Columbia  
Giannetti, Mariassunta, Stockholm School of Economics  
Giarratana, Marco, IE Business School  
Gil, Ricard, Johns Hopkins University  
Gilchrist, Duncan, Harvard University  
Gilje, Erik, University of Pennsylvania  
Gill, David, Purdue University  
Gillen, Ben, Caltech  
Gillette, Jacquelyn, Massachusetts Institute of Technology  
Gine, Mireia, University of Pennsylvania  
Giroud, Xavier, Columbia University  
Gissler, Stefan, Federal Reserve Board  
Giuntella, Osea, University of Pittsburgh  
Glasserman, Paul, Columbia University  
Gleason, Cristi A., University of Iowa  
Glockner, Andreas, Göttingen University  
Glode, Vincent, University of Pennsylvania  
Gneezy, Ayelet, University of California, San Diego  
Godart, Frederic, INSEAD  
Godinho de Matos, Miguel, Católica Lisbon  
Goel, Sharad, Stanford University  
Goerg, Sebastian, Florida State University  
Goette, Lorenz, University of Bonn  
Goex, Robert, University of Zurich  
Goh, Joel, National University of Singapore  
Gokpinar, Bilal, University College London  
Goldberg, Amir, Stanford University  
Goldenberg, Jacob, Interdisciplinary Center Herzliya  
Goldman, Charles, E O Lawrence Berkeley National Laboratory  
Goldman, Eitan, Indiana University  
Goldsmith, Kelly, Northwestern University  
Goldstein, Daniel, Microsoft Research  
Goldstein, Robert, University of Minnesota  
Golman, Russell, Carnegie Mellon University  
Golrezaei, Negin, University of Southern California  
Gondhi, Naveen, INSEAD  
Gong, Guojin, Pennsylvania State University  
Gong, Jie, National University of Singapore  
Gong, Jing, Temple University  
Gong, Xiting, Chinese University of Hong Kong  
Gonzalez-Urbe, Juanita, London School of Economics and Political Science  
Goodwin, Geoffrey, University of Pennsylvania  
Gopal, Anandasivam, University of Maryland, College Park  
Gopalan, Radhakrishnan, Washington University in St. Louis

## 2017 – All Reviewers

Gopinath, Shyam, Indiana University  
Bloomington

Gorbenko, Alexander , University of Southern  
California

Gordon, Brett, Northwestern University

Gordon, Elizabeth, Temple University

Gordy, Michael, Federal Reserve Board

Gornall, Will, The University of British Columbia

Goswami, Indranil, University at Buffalo School  
of Management

Gottlieb, Daniel, Washington University in St.  
Louis

Goulding, Christian, Michigan State University

Gourier, Elise, Princeton University

Gourio, Francois, Federal Reserve Bank of  
Chicago

Gowrisankaran, Gautam, University of Arizona

Goyal, Amit, University of Lausanne

Goyal, Manu, University of Utah

Goyal, Vineet, Columbia University

Goycoolea, Marcos, Universidad Adolfo Ibanez

Graddy, Kathryn, Brandeis University

Granados, Nelson, Pepperdine University

Gravert, Christina, University of Gothenburg

Gray, John, Ohio State University

Green, Brett, University of California, Berkeley

Green, Clifton, Emory University

Green, Etan, University of Pennsylvania

Greenberg, Jason, New York University

Greenstein, Shane, Northwestern University

Greenwood, Brad, University of Minnesota

Grennan, Matthew, University of Toronto

Grewal, Jody, Harvard Business School

Grieco, Daniela, Bocconi University

Griffith, Rachel, Institute for Fiscal Studies

Grimstvedt Meling, Tom, Universitetet i Bergen  
Det Samfunnsvitenskapelige Fakultet

Grinstein, Amir, Ben-Gurion University of the  
Negev

Grinstein, Yaniv, IDC Herzliya

Griskevicius, Vldas, University of Minnesota

Gromb, Denis, HEC Paris

Grossman, Philip, Monash University

Grossman, Zachary, University of California,  
Santa Barbara

Grubb, Michael, Boston College

Grullon, Gustavo, Rice University

Grundl, Serafin, Federal Reserve Board

Gu, Feng, State University of New York at  
Buffalo

Gu, Tiantian, Northeastern University

Gu, Zhaoyang, Chinese University of Hong Kong

Gu, Zheyin (Jane), University of Connecticut

Guajardo, Jose, University of California,  
Berkeley

Guan, Yuyan, City University of Hong Kong

Gubler, Timothy, University of California,  
Riverside

Guedhami, Omrane, University of South  
Carolina

Guest, Nick, Massachusetts Institute of  
Technology

Gui, Luyi, University of California, Irvine

Gulen, Huseyin, Purdue University

Gumus, Mehmet, McGill University

Gunia, Brian, Johns Hopkins University

Gunny, Katherine, University of Colorado at  
Denver

Guo, Hong, University of Notre Dame

Guo, Julian, Michigan State University

Guo, Liang, Chinese University of Hong Kong

Gupta, Arpit, New York University

Gupta, Nandini, Indiana University

Gupta, Varun , University of Chicago

Gupta, Vishal, University of Southern California

Gupte, Akshay, Clemson University

Gur, Yonatan, Stanford University

Gurbaxani, Vijay, University of California, Irvine

Gurkaynak, Refet, Bilkent University

Gustafson, Matthew, Pennsylvania State  
University

Gutierrez, Ro, University of Oregon

Gutjahr, Walter, University of Vienna

Guzman, Jorge, Massachusetts Institute of  
Technology

Haaland, Ingar, Norwegian School of Economics

Hacamo, Isaac, Indiana University Bloomington

Hadlock, Charles, Michigan State University

Haggag, Kareem, Carnegie Mellon University

Hagiu, Andrei, Massachusetts Institute of  
Technology

Hahl, Oliver, Carnegie Mellon University

Halaburda, Hanna, Harvard University

Halevy, Nir, Stanford University

Halevy, Yoram, University of British Columbia

Haliassos, Michael, Goethe University Frankfurt

## 2017 – All Reviewers

Halko, Marja-Liisa, Aalto University School of Business  
Hall, Jonathan, University of Toronto  
Halling, Michael, Stockholm School of Economics  
Ham, Charles, Washington University in St. Louis  
Ham, Sung, George Washington University  
Hameed, Allaudeen, National University of Singapore  
Hamman, John , Florida State University  
Hammitt, James, Harvard University  
Han, Kunsoo, McGill University  
Han, Sang Pil, Arizona State University  
Han, Shu, Yeshiva University  
Hanasusanto, Grani Adiwen, University of Texas at Austin  
Hanley, Kathleen, Lehigh University  
Hannah, Douglas, University of Texas at Austin  
Hansman, Christopher, Imperial College London  
Hao, Lin, University of Notre Dame  
Haran, Uriel, Ben-Gurion University of the Negev  
Hardie, Bruce, London Business School  
Hardisty, David, University of British Columbia  
Harhoff, Dietmar, Max Plank Institute for Innovation and Competition  
Harris, Frederick, Wake Forest University  
Harris, Trevor, Columbia University  
Harrison, Glenn, Georgia State University  
Harsha, Pavithra, IBM Thomas J Watson Research Center  
Hartman-Glaser, Barney, University of California, Los Angeles  
Hartmann, Lorenz, University of Exeter  
Hartzmark, Samuel, University of Southern California  
Haruvy, Ernan, University of Texas at Dallas  
Harvey, Nigel, University College London  
Hasan, Iftekhar, Fordham University  
Hasan, Sharique, duke university  
Haselmann, Rainer, Goethe University Frankfurt  
Hashim, Matthew, Eller College of Management  
Hasija, Sameer, INSEAD  
Haskel, Jonathan, Imperial College London  
Haskell, William, National University of Singapore  
Hasler, Michael, University of Toronto  
Hassin, Refael, Tel Aviv University  
Hau, Harald, University of Geneva  
Hauser, Roie, Temple University  
Haushofer, Johannes, Princeton University  
Haviv, Avery, University of Toronto  
Hawk, Ashton, Ohio State University  
He, Chuan, University of Colorado at Boulder  
He, Jie, University of Georgia  
He, Long, National University of Singapore  
He, Shuangchi, National University of Singapore  
He, Ying, University of Southern Denmark  
Hederos, Karin, Stockholm University  
Hedgcock, William, University of Iowa  
Heese, H. Sebastian, North Carolina State University  
Hegde, Deepak, New York University  
Heger, Stephanie, University of Sydney  
Heidergott, Bernd, Vrije Universiteit  
Heimer, Rawley , Federal Reserve - Cleveland  
Helm, Jonathan, Arizona State University  
Helmers, Christian, Santa Clara University  
Helwege, Jean, University of California, Riverside  
Henderson, Shane, Cornell University  
Henderson, Vicky, University of Warwick  
Henkel, Joachim, Technical University of Munich  
Henry, Tyler, Miami University  
Hermosilla, Manuel, Johns Hopkins University  
Hernandez, Exequiel, University of Pennsylvania  
Herskovic, Bernard, University of California, Los Angeles  
Hertwig, Ralph, Max Planck Institute for Human Development  
Hertz, Michael, Arizona State University  
Herz, Holger, Universite de Fribourg  
Heyerdahl-Larsen, Christian, London Business School  
Heyes, Anthony, University of Ottawa  
Hiatt, Shon, Cornell University  
Higgins, Matt, Georgia Institute of Technology  
Hilary, Gilles, Georgetown University  
Hillegeist, Stephen, Arizona State University  
Hillert, Alexander, Goethe University Frankfurt  
Hilscher, Jens, University of California, Davis  
Hinnosaar, Marit, Collegio Carlo Alberto  
Hinnosaar, Toomas, Collegio Carlo Alberto  
Hirschey, Nicholas, London Business School  
Ho, Yi-Chun, George Washington University

## 2017 – All Reviewers

Ho, Yi-Jen (Ian), Pennsylvania State University  
Hoban, Paul, University of Wisconsin-Madison  
Hobbs, Benjamin, Johns Hopkins University  
Hoberg, Gerard, University of Southern California  
Hochberg, Yael, Rice University  
Hodrick, Robert, Columbia University  
Hoffman, Mitchell, University of Toronto  
Hoffmann, Florian, Universitätsklinikum Bonn  
Hoffmann, Peter, European Central Bank  
Hoisl, Karin, University of Mannheim  
Holburn, Guy, University of Western Ontario  
Hollenbeck, Brett, University of California, Los Angeles  
Holm, Hakan, Lund University  
Holzhacker, Martin, Michigan State University  
Homroy, Swarnodeep, Rijksuniversiteit Groningen Faculteit Economie en Bedrijfskunde  
Hong, Jeff, City University of Hong Kong  
Hong, Yili, Arizona State University  
Honhon, Dorothee, University of Texas at Dallas  
Honka, Elisabeth, University of California, Los Angeles  
Hoopes, Jeffrey, University of North Carolina at Chapel Hill  
Hopfensitz, Astrid, Toulouse School of Economics  
Hora, Manpreet, Georgia Institute of Technology  
Horton, John, New York University  
Hossain, Tanjim, University of Toronto  
Hotchkiss, Edith, Boston College  
Hou, Kewei, Ohio State University  
Houser, Daniel, George Mason University  
Howell, John, Pennsylvania State University  
Howell, Sabrina, New York University  
Hsu, Joanne, Federal Reserve Board  
Hsu, Ming, University of California, Berkeley  
Hsu, Po-Hsuan, University of Hong Kong  
Hu, Bin, University of North Carolina  
Hu, Ming, University of Toronto  
Hu, Zhenyu, National University of Singapore  
Hua, Xinyu, Hong Kong University of Science and Technology  
Huang, Chong, University of California, Irvine  
Huang, Darien, Cornell University  
Huang, Guofang, Carnegie Mellon University  
Huang, Jennie, University of Pennsylvania  
Huang, Jianwei, The Chinese University of Hong Kong  
Huang, Jiekun, University of Illinois at Urbana-Champaign  
Huang, Jing-zhi, Pennsylvania State University  
Huang, Jun, University of Leuven  
Huang, Ke-Wei, National University of Singapore  
Huang, Laura, Harvard Business School  
Huang, Lingbo, Stony Brook University  
Huang, Peng, University of Maryland, College Park  
Huang, Rongbing, Kennesaw State University  
Coles  
Huang, Shawn, Arizona State University  
Huang, Sheng, China Europe International Business School  
Huang, Shiyang, The Hong Kong University  
Huang, Sterling, Singapore Management University  
Huang, Tingliang, Boston College  
Huang, Xiao, Concordia University  
Huang, Xing, Michigan State University  
Huang, Yan, University of Michigan  
Huchette, Joey, Massachusetts Institute of Technology  
Huddart, Steven, Pennsylvania State University  
Huesmann, Katharina, University of Cologne  
Huffman, David, University of Oxford  
Huffman, Matthew, University of California, Davis  
Hugonnier, Julien, Ecole Polytechnique Fédérale de Lausanne  
Hui, Kai Wai, University of Hong Kong  
Hui, Sam, New York University  
Hui, Xiang, Massachusetts Institute of Technology  
Humphery-Jenner, Mark, UNSW Australia  
Hund, John, University of Georgia  
Huszar, Zsuzsa, NUS Business School  
Hutchison-Krupat, Jeremy, University of Virginia  
Hwang, Byoung-Hyoun, Cornell University  
Hwang, Elina, University of Washington  
Hwang, Woonam, HEC Paris  
Hydari, Muhammad (Zia), University of Pittsburgh  
Hyndman, Kyle, University of Texas at Dallas  
Iancu, Dan, Stanford University

## 2017 – All Reviewers

Ibrahim, Rouba, University College London  
Igan , Deniz, International Monetary Fund  
Illiev, Peter, Pennsylvania State University  
Imas, Alex, Carnegie Mellon University  
Inderst, Roman, Frankfurt University  
Ingolfsson, Armann, University of Alberta  
Ion, Mihai, University of Arizona  
Ippolito, Filippo, Pompeu Fabra University  
Irani, Rustom, University of Illinois  
Iriberry, Nagore, Pompeu Fabra University  
Irlenbusch, Bernd, University of Cologne  
Irwin, Julie, The University of Texas at Austin  
Ishihara, Masakazu, New York University  
Islegen, Ozge, Northwestern University  
Israelsen, Ryan Dwight, Indiana University  
Ivkovich, Zoran, Michigan State University  
Iyengar, Raghuram, University of Pennsylvania  
Iyer, Krishnamurthy, Cornell University  
Jabr, Wael, Georgia State University  
Jackwerth, Jens, University of Konstanz  
Jacob, Martin, WHU – Otto Beisheim School of Management  
Jacobs, Bruno, Erasmus University Rotterdam  
Jacobs, Kris, McGill University  
Jaffe, Sonia, University of Chicago  
Jagabathula, Srikanth, New York University  
Jagannathan, Ravi, Northwestern University  
Jagolinzer, Alan, University of Cambridge  
Jaimungal, Sebastian, University of Toronto  
Jain, Aditya, Baruch College  
Jain, Amit, National University of Singapore  
Jain, Archana, Rochester Institute of Technology  
Jain, Nitish, London Business School  
Jain, Sanjay, University of Texas at Dallas  
Jame, Russell, University of Kentucky  
James, Christopher, University of Florida  
Janakiraman, Ganesh, The University of Texas at Dallas  
Janakiraman, Ramkumar, University of South Carolina  
Jang, Yeejin, Purdue University  
Jank, Wolfgang, University of South Florida  
Janssen, Maarten, University of Vienna  
Jaravel, Xavier, Stanford University  
Jasin, Stefanus, University of Michigan  
Jaspersen, Johannes, Ludwig Maximilian University of Munich  
Jayaraman, Sudarshan, University of Rochester  
Jenkins, Nicole, University of Kentucky  
Jeon, Doh-Shin, Toulouse School of Economics  
Jeppesen, Lars, Copenhagen Business School  
Jerath, Kinshuk, Columbia University  
Jeziorski, Przemyslaw, University of California, Berkeley  
Jiang, Baojun, Washington University in St. Louis  
Jiang, Hao, Michigan State University  
Jiang, John, Michigan State University  
Jiang, Ruiwei, University of Michigan  
Jiang, Wei, Columbia University  
Jiang, Wenxi, Chinese University of Hong Kong  
Jin, Fujie, Indiana University Bloomington  
Jin, Lawrence, Caltech  
Jindapon, Paan, University of Alabama  
Jing, Bing, Cheung Kong Graduate School of Business  
Jinna, Pranay, Emory University  
Johannes, Michael, Columbia University  
Johannesson, Magnus, Stockholm School of Economics  
John, Leslie, Harvard Business School  
Johnson, Garrett, University of Rochester  
Johnson, Matthew, Duke University  
Johnson, Nicole, University of California, Berkeley  
Johnson, Shane, Texas A&M University  
Johnson, Steven, University of Virginia  
Johnson, Travis, The University of Texas at Austin  
Johnston, David, Monash University  
Jonasson, Jonas, Massachusetts Institute of Technology  
Jones, Damon, University of Chicago  
Jones, Daniel, University of South Carolina  
Jose, Victor Richmond, Georgetown University  
Joseph, Kissan, University of Kansas  
Joshi, Amit, University of Central Florida  
Joshi, Yogesh, University of Maryland, College Park  
Joslin, Scott, University of Southern California  
Jotikasthira, Chotibhak, Southern Methodist University  
Jotikasthira, Pab, Southern Methodist University  
Juergens, Jennifer, Drexel University  
Julliard, Christian, London School of Economics and Political Science

## 2017 – All Reviewers

Juneja, Sandeep, Tata Institute of Fundamental Research  
Jung, Changmi, Johns Hopkins University  
Jung, Michael, New York University  
Kabra, Ashish, INSEAD  
Kacperczyk, Olenka, London Business School  
Kacperczyk, Aleksandra, Massachusetts Institute of Technology  
Kacperczyk, Marcin, Imperial College London  
Kadan, Ohad, Washington University in St. Louis  
Kadapakkam, Palani-Rajan, University of Texas at San Antonio  
Kadiyala, Bharadwaj, University of Texas at Dallas  
Kadiyali, Vrinda, Cornell University  
Kadyrzhanova, Dalida, Georgia State University  
Kagan, Evgeny, University of Michigan  
Kahl, Matthias, Indiana University Bloomington  
Kahn, Lisa, Yale University  
Kaibel, Volker, Otto-von-Guericke-Universitat Magdeburg Medizinische Fakultat  
Kaiser, Ulrich, University of Zurich  
Kajackaite, Agne, University of Cologne  
Kalay, Alon, Columbia University  
Kalkanci, Basak, Georgia Institute of Technology  
Kallus, Nathan, Cornell University  
Kamada, Yuichiro, University of California, Berkeley  
Kamrad, Bardia, Georgetown University  
Kane, Gerald, Boston College  
Kang, Karam, Carnegie Mellon University  
Kang, Qiang, University of Miami  
Kang, Wanmo, KAIST  
Kang, Xiang, University of Texas at Austin  
Kankanhalli, Atreyi, National University of Singapore  
Kannan, P., University of Maryland, College Park  
Kanodia, Chandra, University of Minnesota  
Kanoria, Yash, Columbia University  
Kapadia, Nishad, Tulane University  
Karagozoglu, Emin, Bilkent University  
Karakas, Oguzhan, University of Cambridge  
Karau, Steve, Southern Illinois University Carbondale  
Karelaia, Natalia, INSEAD  
Karmarkar, Uma, Harvard Business School  
Kartal, Melis, Wirtschafsuniversitat Wien  
Kaspi, Mor, Tel-Aviv University

Kathuria, Abhishek, The University of Hong Kong  
Katona, Zsolt, University of California, Berkeley  
Kaur, Supreet, University of California, Berkeley  
Kaushik, Nilam, University College London  
KC, Diwas, Emory University  
Ke, Bin, National University of Singapore  
Ke, T. Tony, Massachusetts Institute of Technology  
Kebede, Bereket, University of East Anglia  
Kelly, Bryan, University of Chicago  
Kelly, Peter, University of Notre Dame  
Keloharju, Matti, Aalto University School of Business  
Kemahlioglu-Ziya, Eda, North Carolina State University  
Kemel, Emmanuel, University of Paris I  
Kempf, Elisabeth, University of Chicago  
Keppo, Jussi, National University of Singapore  
Kermani, Amir, University of California, Berkeley  
Kerr, Sari, Wellesley College  
Kesavan, Saravanan, North Carolina University at Chapel Hill  
Keskin, N. Bora, Duke University  
Kessler, Judd, University of Pennsylvania  
Kesten, Onur, Carnegie Mellon University  
Keswani, Aneel, Cass Business School  
Keum, Daniel, New York University  
Keung, Edmund, National University of Singapore  
Keusch, Thomas, INSEAD  
Khalmetski, Kiryl, University of Cologne  
Khan, Urooj, Columbia University  
Khessina, Olga, University of Illinois at Urbana-Champaign  
Khurana, Inder, University of Missouri  
Khwaja, Ahmed, University of Cambridge  
Kieschnick, Robert, University of Texas at Dallas  
Kihlstrom, Richard, University of Pennsylvania  
Kilduff, Gavin, New York University  
Kilian, Lutz, University of Michigan  
Kim, Antino, Indiana University Bloomington  
Kim, Eun-Hee, Fordham University  
Kim, Hae-Young, New York Medical College  
Kim, Hugh, University of South Carolina  
Kim, Jerry, Rutgers Business School  
Kim, Jin-Mo, Rutgers University

## 2017 – All Reviewers

Kim, Jun, Hong Kong University of Science and Technology  
Kim, Keongtae, City University of Hong Kong  
Kim, Kyoung-Kuk, Korea Advanced Institute of Science and Technology  
Kim, Michael, University of Toronto  
Kim, Sang Won, Columbia University  
Kim, Sang-Hyun, Yale University  
Kim, Seil, Baruch College  
Kim, Sharon, Johns Hopkins University  
Kim, Song-Hee, University of Southern California  
Kim, Soohun, Georgia Tech  
Kim, Taehyun, University of Notre Dame  
Kim, Tongil "TI", Emory University  
Kim, Yongtae, Santa Clara University  
Kimbrough, Steven, University of Pennsylvania  
Kirchler, Erich, University of Vienna  
Kirchler, Michael, University of Innsbruck  
Kirilenko, Andrei, Imperial College London  
Kirkegaard, René, University of Guelph  
Kisin, Roni, Analysis Group  
Klassen, Robert, University of Western Ontario  
Klein, April, New York University  
Klein, Peter, Baylor University  
Kleinbaum, Adam, Dartmouth College  
Klibanoff, Peter, Northwestern University  
Klos, Alexander, University of Kiel  
Klose, Andreas, Aarhus University  
Knight, Craig, Haddleton Knight  
Knill, April, Florida State University  
Knott, Anne Marie, Washington University in St. Louis  
Knox, George, Tilburg University  
Kocabiyikoglu, Ayse, Bilkent University  
Kocak, Ozgecan, Sabanci University  
Kocaman, Ayse Selin, Bilkent University  
Kocher, Martin, University of Munich  
Koenig-Kersting, Christian, Ruprecht-Karls Universität Heidelberg  
Koenigsberg, Oded, London Business School  
Koetter, Michael, Halle Institute for Economic Research  
Kogan, Shimon, Carnegie Mellon University  
Kogut, Bruce, Columbia University  
Koh, Kevin, Nanyang Technological University  
Koharki, Kevin, Washington University in St. Louis

Kokkodis, Marios, Boston College  
Koksalan, Murat, Orta Dogu Teknik Universitesi  
Kolev, Julian, Southern Methodist University  
Kölle, Felix, University of Nottingham  
Konchitchki, Yaniv, University of California, Berkeley  
Kong, Guangwen, University of Minnesota  
Kong, Qingxia, Erasmus University Rotterdam  
Koning, Rembrand, Harvard Business School  
Konow, James, Loyola Marymount University  
Kontek, Krzysztof, Warsaw School of Economics  
Koop, Gregory, Eastern Mennonite University  
Korniotis, George, University of Miami  
Kornish, Laura, University of Colorado at Boulder  
Körpeoğlu, Ersin, University College London  
Kos, Nenad, Bocconi University  
Koskinen, Yrjo, University of Calgary  
Kosowski, Robert, Imperial College London  
Kostami, Vasiliki, London Business School  
Kostovetsky, Leonard, Boston College  
Kouchaki, Maryam, Northwestern University  
Koulayev, Sergei, Consumer Financial Protection Bureau  
Kovacs, Balazs, Yale University  
Kozhan, Roman, University of Warwick  
Kraft, Holger, Goethe University Frankfurt  
Kraft, Pepa, HEC Paris  
Kraft, Tim, University of Virginia  
Krahmer, Daniel, University of Bonn  
Kray, Laura, University of California, Berkeley  
Kremer, Mirko, Frankfurt School of Finance & Management  
Krepely Pool, Veronika, Indiana University  
Kretschmer, Tobias, Ludwig Maximilian University of Munich  
Krieger, Joshua, Harvard Business School  
Krishnamurthy, Srinivasan, North Carolina State University  
Krishnan, Harish, University of British Columbia  
Krishnan, Karthik, Northeastern University  
Krishnan, Ranjani, Michigan State University  
Kroft, Kory, University of Toronto  
Krokhmal, Pavlo, University of Arizona  
Kroll, Stephan, Colorado State University  
Krupka, Erin, University of Michigan  
Kube, Sebastian, University of Bonn  
Kubilay, Elif, Bocconi University

## 2017 – All Reviewers

Kübler, Dorothea, WZB Berlin  
Kuchler, Theresa, New York University  
Kuehn, Lars-Alexander, Carnegie Mellon University  
Kuhn, Jeffrey, University of North Carolina at Chapel Hill  
Kuhn, Peter, University of California, Santa Barbara  
Kulchina, Elena, Duke University  
Kull, Thomas, Arizona State University  
Kumar, Alok, University of Miami  
Kumar, Anuj, University of Florida  
Kumar, Ashish, Aalto University School of Business  
Kumar, Praveen, University of Houston  
Kumar, Shyam, Rensselaer Polytechnic Institute  
Kumar, Subodha, Temple University  
Kumar, Vineet, Yale University  
Kummer, Michael, Georgia Institute of Technology  
Kung, Howard, London Business School  
Kunnumkal, Sumit, Indian School of Business  
Kunze, Astrid, Norges Handelshoyskole  
Kuong, John, INSEAD  
Kuppuswamy, Venkat, University of North Carolina at Chapel Hill  
Kurtzman, Robert, Federal Reserve Board  
Kushwaha, Tarun, University of North Carolina  
Kvaloy, Ola, University of Stavanger  
Kvasov, Dmitriy, Waseda Daigaku  
Kwan, Alan, Cornell University  
Kwan, Amy, University of Sydney Business School  
Kwark, Young, University of Florida  
Kwon, H. Dharma, University of Illinois at Urbana-Champaign  
Labro, Eva, University of North Carolina at Chapel Hill  
Lacetera, Nicola, University of Toronto  
Laczo, Sarolta, University of Surrey  
Lahiri, Atanu, University of Texas at Dallas  
Lai, Guoming, University of Texas at Austin  
Lakner, Peter, New York University  
Lam, Henry, Columbia University  
Lam, Son, University of Georgia  
Lambrecht, Anja, London Business School  
Lampe, Ryan, California State University, East Bay  
Landvoigt, Tim, University of Pennsylvania  
Langberg, Nisan, University of Houston  
Lange, Andreas, University of Hamburg  
Langer, Nishtha, Rensselaer Polytechnic Institute  
Langer, Thomas, University of Muenster  
Lappas, Theodoros, Stevens Institute of Technology  
Larkin, Ian, University of California, Los Angeles  
Larkin, Yelena, York University  
Larocque, Stephannie, University of Notre Dame  
Larrick, Richard, Duke University  
Larson, Chad, Olin Business School  
Larson, James, Loyola University Chicago  
Lauer, Thomas, University of Cologne  
Lauga, Dominique, University of Cambridge  
Laureiro-Martinez, Daniella, ETH Zurich  
Laux, Volker, University of Texas at Austin  
Lavieri, Mariel, University of Michigan  
Law, Kelvin, Tilburg University  
Lawrence, Alastair, University of California, Berkeley  
Lawrenz, Jochen, University of Innsbruck  
Layne-Farrar, Anne, Charles River Associates  
Le Mens, Gael, Pompeu Fabra University  
Lea, Stephen E.G., University of Exeter  
Leary, Mark, Washington University in St. Louis  
LeBoeuf, Robyn, Washington University in St. Louis  
Lecuona, Ramon, Duke University  
L'Ecuyer, Pierre, University of Montreal  
Lee, Clarence, Harvard Business School  
Lee, Deishin, Boston College  
Lee, Dokyun, Carnegie Mellon University  
Lee, Donald, Yale University  
Lee, Hsiao-Hui, University of Hong Kong  
Lee, Jeho, Seoul National University College of Business Administration  
Lee, Jeongsik, Drexel University  
Lee, Jongsub, University of Florida  
Lee, Julia, University of Michigan  
Lee, Michael, University of California, Irvine  
Lee, Sam (Sunghan), Iowa State University  
Lee, Samuel, Santa Clara University  
Lee, Sang-yong Tom, Hanyang University  
Lee, Stephanie, University of Washington  
Lee, Yen-Jung, National Taiwan University

## 2017 – All Reviewers

Lee, Yi-Tsung, Guanghua School of Management, Peking University  
Lehar, Alfred , University of Calgary  
Lehrer, Steven, Queen's University  
Lei, Vivian, University of Wisconsin-Milwaukee  
Leibbrandt, Andreas, Monash University  
Leider, Stephen, University of Michigan--Ann Arbor  
Leitner, Yaron, Federal Reserve Bank of Philadelphia  
Lemoine, Derek, University of Arizona  
Lempert, Robert, RAND Corporation  
Leng, Mingming, Lingnan University  
Lenk, Peter, University of Michigan  
Lennox, Clive, University of Southern California  
Leonello , Agnese , European Central Bank  
Lergetporer, Philipp, ifo Center for the Economics of Education  
Lerman, Alina, Yale University  
Leshno, Jacob, Columbia University  
Lester, Rebecca, Stanford University  
Letina, Igor, University of Bern  
Leung, Ming, University of California, Berkeley  
Leung, Tim, University of Washington  
Levav, Jonathan, Stanford University  
Levi, Yaron, University of Southern California  
Levin, Carolyn, Rutgers University  
Levine, David I., University of California, Berkeley  
Levine, Emma, University of Pennsylvania  
Levine, Oliver, University of Wisconsin-Madison  
Levine, Ross, University of California, Berkeley  
Levine, Sheen, University of Texas at Dallas  
Levit, Doron, University of Pennsylvania  
Levitt, Steven, University of Chicago  
Levy, Matthew, London School of Economics and Political Science  
Lewellen, Jonathan, Dartmouth College  
Lewellen, Stefan , London Business School  
Lewis, Demetrius, Emory University  
Lewis, Joshua, University of Pennsylvania  
Lewis, Randall, Netflix  
l'Haridon, Olivier, University of Rennes 1  
Li, Alice, Ohio State University  
Li, Andrew, Massachusetts Institute of Technology  
Li, Beibei, New York University  
Li, Bin, Wuhan University  
Li, Bingyang, Cornerstone Research Inc. San Francisco  
Li, Cuihong, University of Connecticut  
Li, Danielle, Harvard University  
Li, Danyang, Hofstra University  
Li, Dongmei, University of South Carolina  
Li, Edward, Baruch College  
Li, Erica, Cheung Kong Graduate School of Business  
Li, Gen, Columbia University  
Li, Guang, Queen's University  
Li, Hongmin, Arizona State University  
Li, Jin, Northwestern University  
Li, Jingyuan, Lingnan University  
Li, Jonathan, University of Ottawa  
Li, Jun, University of Michigan  
Li, Kevin, University of California, Riverside  
Li, King King, City University of Hong Kong  
Li, Krista, Indiana University  
Li, Laura Yue, University of Illinois at Urbana-Champaign  
Li, Lei, University of Kansas  
Li, Lucius , London School of Economics and Political Science  
Li, Meng, Rutgers University  
Li, Meng, University of Colorado at Denver  
Li, Ningzhong, University of Texas at Dallas  
Li, Oliver, National University of Singapore  
Li, Ping, Rutgers University-New Brunswick  
Li, Qing, Hong Kong University of Science and Technology  
Li, Rong, Syracuse University  
Li, Shibo, Indiana University  
Li, Si, Wilfrid Laurier University  
Li, Sophia, Michigan State University  
Li, Tao, University of Warwick  
Li, Ting, Erasmus University  
Li, Weikai, Hong Kong University of Science and Technology  
Li, Wenli, Federal Reserve Bank of Philadelphia  
Li, Xi, Temple University  
Li, Xi, University of Toronto  
Li, Xiao-Bai, University of Massachusetts Lowell  
Li, Xiaoyang, Shanghai Advanced Institute of Finance  
Li, Xitong, HEC Paris  
Li, Yan, Temple University

## 2017 – All Reviewers

Li, Yang, Cheung Kong Graduate School of Business  
Li, Ye, The Ohio State University  
Li, Yinghua, Arizona State University  
Li, Yuanhao, Norwegian School of Economics  
Li, Yuanzhi, Temple University  
Li, Zhuoxin (Allen), Boston College  
Liang, Bing, University of Massachusetts Amherst  
Liang, Hao, Singapore Management University  
Liang, Yi, Temple University  
Liao, Scott, University of Toronto  
Libby, Theresa, University of Waterloo  
Liberali, Gui, Erasmus University  
LiCalzi, Marco, Università Ca' Foscari Venezia  
Lie, Erik, University of Iowa  
Lim, Michael, Seoul National University, SNU Business School  
Lim, W. S., National University of Singapore  
Lim, Yun Fong, Singapore Management University  
Lin, Chen, Chinese University of Hong Kong  
Lin, Jianjing, Tulane University  
Lin, Mingfeng, University of Arizona  
Lin, Song, Hong Kong University of Science and Technology  
Lin, Tse-Chun, University of Hong Kong  
Lin, Xiaoji, Ohio State University  
Linardi, Sera, University of Pittsburgh  
Linck, Jim, Southern Methodist University  
Linderman, Kevin, University of Minnesota  
Lindsey, Laura, Arizona State University  
Lines, Anton, Columbia University  
Ling, Zhejia, Iowa State University  
Linnainmaa, Juhani, University of Chicago  
Lipscomb, Molly, University of Virginia  
Liskovich, Inessa, University of Texas at Austin  
Lisowsky, Petro, University of Illinois at Urbana-Champaign  
Litov, Lubomir, University of Oklahoma  
Liu, Andrew, Purdue University  
Liu, Baixiao, Florida State University  
Liu, Ben, City University of Hong Kong  
Liu, Chengwei, University of Warwick  
Liu, Chris, University of Toronto  
Liu, Dengpan, Iowa State University  
Liu, Guangwu, City University of Hong Kong  
Liu, Hening, University of Manchester  
Liu, Hong, Washington University in St. Louis  
Liu, Hongju, University of Connecticut  
Liu, Jane, Guanghua School of Management, Peking University  
Liu, Lin, University of Central Florida  
Liu, Michelle, Hunter College  
Liu, Nan, Boston College  
Liu, Qihong, University of Oklahoma  
Liu, Qing, Boston University  
Liu, Qing, University of Wisconsin-Madison  
Liu, Tracy, Tsinghua University  
Liu, Wendy, University of California, San Diego  
Liu, Xiao, New York University  
Liu, Xiaoding, University of Oregon  
Liu, Yan, Texas A&M University  
Liu, Yue, Tsinghua University  
Liu, Zhixin, University of Michigan-Dearborn  
Lobel, Ilan, New York University  
Lochstoer, Lars, Columbia University  
Lockhart, Brandon, Clemson University  
Loehndorf, Nils, Vienna University of Economics and Business  
Loewenstein, George, Carnegie Mellon University  
Logg, Jennifer, Harvard Business School  
Loh, Roger, Singapore Management University  
Loomes, Graham, University of Warwick  
Loos, Benjamin, Goethe University  
Lopomo, Giuseppe, Duke University  
Lou, Xiaoxia, University of Delaware  
Loualiche, Erik, Massachusetts Institute of Technology  
Loughran, Tim, University of Notre Dame  
Louis, Henock, Pennsylvania State University  
Loumrioti, Maria, University of Southern California  
Loureiro, Gilberto, University of Minho  
Loutskina, Elena, University of Virginia  
Lovejoy, William, University of Michigan  
Lovett, Mitch, University of Rochester  
Low, Angie, Nanyang Business School  
Lowery, J., University of Texas at Austin  
Lu, Jingfeng, National University of Singapore  
Lu, Shijie, University of North Carolina at Chapel Hill  
Lu, Susan, Purdue University  
Lu, Tong, University of Houston

## 2017 – All Reviewers

Lu, Xiaomeng, Shanghai Institute for Advanced Studies

Lu, Yan, University of Florida

Lu, Yao, Tsinghua University

Lu, Yingda, Rensselaer Polytechnic Institute

Lu, Yiqing, New York University Shanghai

Lu, Yixin, George Washington University

Lubin, Benjamin, Boston University

Luca, Michael, Harvard Business School

Lucas, Deborah, Massachusetts Institute of Technology

Luciano, Elisa, Università degli Studi di Torino

Luedtke, James, University of Wisconsin-Madison

Luhmann, Christian, Stony Brook University

Luo, Hong, Harvard Business School

Luo, Jiao, University of Minnesota in Minneapolis

Luo, Lan, University of Southern California

Luo, Patrick, Harvard Business School

Luo, Wei, IESE Business School

Luo, Xueming, Temple University

Lyandres, Evgeny, Boston University

Lyle, Matthew, Northwestern University

Lynham, John, University of Hawaii

Lyons, Liz, University of California, San Diego

Lyytinen, Kalle, Case Western Reserve University

M.K. Christy, Cheung, Hong Kong Baptist University

Ma, Dali, Drexel University

Ma, Liye, University of Maryland, College Park

Ma, Song, Yale University

Ma, Yueran, Harvard University

Maccheroni, Fabio, Bocconi University

MacCormack, Alan, Harvard Business School

MacGarvie, Megan, Boston University

Macias, Antonio, Baylor University

Maciejovsky, Boris, University of California, Riverside

Macis, Mario, Johns Hopkins University

MacLeod, Bentley, Columbia University

Madhavan, Ananth, BlackRock Inc.

Madhavan, Ravi, University of Pittsburgh

Magesan, Arvind, University of Calgary

Magnani, Jacopo, New York University Abu Dhabi

Mahlendorf, Matthias, Frankfurt School of Finance & Management

Maio, Paulo, Hanken School of Economics

Mak, Ho-Yin, Hong Kong University of Science and Technology

Mak, Vincent, University of Cambridge

Makarov, Dmitry, National Research University Higher School of Economics

Makhdoumi, Ali, Massachusetts Institute of Technology

Maksimovic, Vojislav, University of Maryland, College Park

Malekian, Azarakhsh, University of Toronto

Malenko, Andrey, Massachusetts Institute of Technology

Malenko, Nadya, Boston College

Malinova, Katya, University of Toronto

Malkhozov, Aytek, Federal Reserve Board

Malter, Daniel, Harvard Business School

Manela, Asaf, Washington University in St. Louis

Mani, Vidya, Pennsylvania State University

Mann, William, University of California, Los Angeles

Mannino, Michael, University of Colorado at Denver

Manshadi, Vahideh, Massachusetts Institute of Technology

Mansi, Sattar, Virginia Tech

Manzini, Paola, University of St Andrews

Mao, Andrew, Microsoft Research

Mao, Yifei, Cornell University

Marechal, Michel Andre, University of Zurich

Marinesci, Simone, University of Pennsylvania

Marinovic, Ivan, Stanford University

Markant, Douglas, University of North Carolina at Charlotte

Markle, Alex, University of Pennsylvania

Markov, Stanimir, Southern Methodist University

Marley, Tony, University of Victoria

Marquardt, Carol, Baruch College

Marr, Jennifer, Georgia Institute of Technology

Marschke, Gerry, University at Albany, SUNY

Martignoni, Dirk, Università della Svizzera italiana

Martin, Daniel, Paris School of Economics

Martin, Kirsten, George Washington University

## 2017 – All Reviewers

Martin, Xiumin, Washington University in St. Louis  
Martinez Jerez, F. Asis, University of Notre Dame  
Martinez, Jose, University of Connecticut  
Martinez, Seung-Keun, University of California, San Diego  
Martínez-de-Albéniz, Victor, IESE Business School  
Martin-Utrera, Alberto, Lancaster University Management School  
Marx, Matt, Massachusetts Institute of Technology  
Maslach, David, Florida State University  
Mason, Malia, Columbia University  
Masulis, Ronald, The University of New South Wales  
Matějka, Michal, Arizona State University  
Matos, Pedro, University of Virginia  
Matsushima, Noriaki, Osaka University  
Matveyev, Egor, University of Alberta  
Mauer, David, University of North Carolina at Charlotte  
Maurer, Thomas, Washington University  
Maxwell, John, Indiana University  
Mayew, Bill, Duke University  
Mayhew, Brian, University of Wisconsin-Madison  
Mayzlin, Dina, Yale University  
Mazumder, Rahul, Massachusetts Institute of Technology  
McAlister, Leigh, University of Texas at Austin  
McBride, Michael, University of California, Irvine  
McCullough, Jeffrey, University of Michigan  
McDevitt, Ryan, University of Rochester  
McDonnell, Mary-Hunter, Georgetown University  
McElheran, Kristina, University of Toronto  
McGrath, Patia, University of North Carolina at Chapel Hill  
McGraw, A. Peter, University of Colorado at Boulder  
McHale, John, National University of Ireland, Galway  
McInnis, John, University of Texas at Austin  
McKeon, Stephen, University of Oregon  
McShane, Blakeley, Northwestern University  
McVay, Sarah, University of Washington  
Medina, Paolina, Texas A&M University  
Meer, Jonathan, Texas A&M University  
Mehra, Amit, University of Texas at Dallas  
Mehrotra, Vikas, University of Alberta  
Mehta, Mihir, University of Michigan  
Mejia, Jorge, Indiana University  
Melville, Nigel, University of Michigan  
Melzer, Brian, Northwestern University  
Menegatti, Mario, University of Parma  
Meng, Juanjuan, Peking University  
Menkveld, Albert, VU  
Menon, Syam, University of Texas at Dallas  
Menon, Tanya, Ohio State University  
Mergenthaler, Richard, The University of Arizona  
Merkley, Ken, Cornell University  
Merluzzi, Jennifer, Tulane University  
Merrick, Jason, Virginia Commonwealth University  
Mersereau, Adam, University of North Carolina at Chapel Hill  
Meschke, Felix, University of Kansas  
Metzger, Daniel, Stockholm School of Economics  
Meyvis, Tom, New York University  
Mezzanotti, Filippo, Northwestern University  
Miao, Jianjun, Boston University  
Michaeli, Beatrice, University of California, Los Angeles  
Michaelides, Alexander, Imperial College London  
Michaels, Guy, London School of Economics and Political Science  
Michels, Jeremy, University of Pennsylvania  
Mihm, Jurgen, INSEAD  
Mihm, Maximilian, New York University Abu Dhabi  
Miklós-Thal, Jeanine, University of Rochester  
Miller, Amalia, University of Virginia  
Miller, Brian, Indiana University  
Miller, David, University of Michigan  
Millner, Antony, London School of Economics and Political Science  
Mills, Alex, Indiana University  
Milner, Joseph, University of Toronto  
Mindruta, Denisa, HEC Paris  
Minnis, Michael, University of Chicago

## 2017 – All Reviewers

Minson, Julia, Harvard University  
Minutti-Meza, Miguel , University of Miami  
Miric, Milan, University of Southern California  
Mironov, Maxim, IE Business School  
Miron-Spektor, Ella, Technion Israel Institute of Technology  
Mishra, Birendra, University of California, Riverside  
Mishra, Dev, University of Saskatchewan  
Mišić, Velibor, University of California, Los Angeles  
Misra, Kanishka, University of California, San Diego  
Mitchell, Matthew, University of Toronto  
Mittendorf, Brian, The Ohio State University  
Moallemi, Ciamac, Columbia University  
Mobbs, Shawn, University of Alabama  
Mochon, Daniel, Tulane University  
Moe, Wendy, University of Maryland, College Park  
Moeen, Mahka, University of North Carolina  
Mohanram, Partha, University of Toronto  
Moinas, Sophie, Toulouse School of Economics  
Mojir, Navid, Yale University  
Molitor, David, University of Illinois at Urbana-Champaign  
Mollerstrom, Johanna, George Mason University  
Mollick, Ethan, University of Pennsylvania  
Monahan, Steven, INSEAD  
Mondria, Jordi, University of North Carolina at Chapel Hill  
Montazerhodjat, Vahid, Massachusetts Institute of Technology  
Montez, Joao , Universtiy of Lausanne  
Montgomery, Alan, Carnegie Mellon University  
Montoya, Ricardo, Universidad de Chile  
Moon, Ken, University of Pennsylvania  
Moore, Don, University of California, Berkeley  
Moore, Sarah, University of Alberta  
Morais, Bernardo, Federal Reserve Board  
Moreira, Alan, Yale University  
Morellec, Erwan, Ecole Polytechnique Fédérale de Lausanne  
Moreno, Antonio, Harvard Business School  
Morewedge, Carey, Boston University  
Moritz, Brent, Pennsylvania State University  
Mormann, Milica, University of Miami  
Mors, Louise, Copenhagen Business School  
Morse, Adair, University of California, Berkeley  
Morsink, Karlijn, University of Oxford  
Moser, Petra, New York University  
Mostagir, Mohamed, University of Michigan  
Moulton, Pamela, Cornell University  
Moyen, Nathalie, University of Colorado at Boulder  
Mu, Liying, University of Delaware  
Muchnik, Lev, New York University  
Mudambi, Susan, Temple University  
Mueller, Maximilian, WHU – Otto Beisheim School of Management  
Mueller, Philippe, London School of Economics and Political Science  
Mueller, Wieland, University of Vienna  
Muermann, Alexander, Vienna University of Economics and Business  
Muharremoglu, Alp, University of Texas at Dallas  
Muir, Tyler, Yale University  
Mukharlamov, Vladimir, Georgetown University  
Mukherjee, Abhiroop, Hong Kong University of Science and Technology  
Mukherjee, Rajiv, Southern MEthodist University  
Mukherjee, Sumitra, Nova Southeastern University  
Müller-Trede, Johannes, University of California, San Diego  
Mullins, William, University of Maryland, College Park  
Mumford, Kevin, Purdue University  
Mummalaneni, Simha, University of Washington  
Muravyev, Dmitriy , Boston College  
Murfin, Justin, Yale University  
Murmman, Martin, Centre for European Economic Research in Mannheim  
Murooka, Takeshi, Osaka University  
Murphy, Dermot , University of Illinois at Chicago  
Murray, Scott, University of Nebraska  
Musalem, Andres, Universidad de Chile  
Muthukrishnan, A.V., Hong Kong University of Science and Technology  
Muthulingam, Suresh, Pennsylvania State University

## 2017 – All Reviewers

Myers, Brett, Texas Tech University  
Nadarajah, Selvaprabu, University of Illinois at Chicago  
Nadtochiy, Sergey, University of Michigan--Ann Arbor  
Naecker, Jeffrey, Wesleyan University  
Nafziger, Julia, Aarhus University  
Nagaraj, Abhishek, University of California, Berkeley  
Nagarajan, Mahesh, University of British Columbia  
Nagle, Frank, University of Southern California  
Naik, Prasad, University of California, Davis  
Nain, Amrita, University of Iowa  
Najafi-Asadolahi, Sami, LSanta Clara University  
Nambisan, Satish, Case Western Reserve University  
Nan, Ning, University of British Columbia  
Nanda, Ramana, Harvard Business School  
Nandkumar, Anand, Indian School of Business  
Nandy, Debarshi, Brandeis University  
Naranjo, Patricia, Rice University  
Narayanamoorthy, Gans, Tulane University  
Narayanan, Sridhar, Stanford University  
Narayanan, Sriram, Michigan State University  
Nardotto, Mattia, Katholieke Universiteit Leuven Groep Humane Wetenschappen  
Narita, Yusuke, Yale University  
Nasiry, Javad, Hong Kong University of Science and Technology  
Nasser, Sherif, Cornell University  
Natarajan, Karthik, Singapore University of Technology and Design  
Natarajan, Karthik, University of Minnesota  
Nathanson, Charles, Northwestern University  
Nave, Gideon, Caltech  
Naveen, Lalitha, Temple University  
Nax, Heinrich, ETH-Rat und im ETH-Bereich  
Nazerzadeh, Hamid, University of Southern California  
Neamtiu, Monica, University of Arizona  
Nediak, Mikhail, Queen's University  
Negoescu, Diana, University of Minnesota  
Negro, Giacomo, Emory University  
Nelson, Karen, Texas Christian University  
Nembhard, Ingrid, Yale University  
Neugebauer, Tibor, University of Luxembourg  
Nevskaya, Yulia, Olin Business School  
Newberry, Peter, Pennsylvania State University  
Newman, George, Yale University  
Neyse, Levent, Institut fur Weltwirtschaft an der Universitat Kiel  
Nezlobin, Alexander, University of California, Berkeley  
Ng, David, Cornell University  
Ng, Jeffrey, Hong Kong Polytechnic University  
Ng, Weiyi, University of California, Berkeley  
Nguyen , Thanh, Purdue University  
Nguyen, Bang, Cambridge University  
Nguyen, Quoc, University of Illinois at Chicago  
Ngwe, Donald, Harvard Business School  
Ni, Jian, Johns Hopkins University  
Nian, Tingting, New York University  
Nickerson, Jackson, Washington University in St. Louis  
Nickerson, Jordan, Boston College  
Niculescu, Marius, Georgia Institute of Technology  
Niedemayer, Andras, University of Mannheim  
Nielsen, Kirby , Ohio State University  
Niessen-Ruenzi , Alexandra, University of Mannheim  
Niessner, Marina, Yale University  
Nijs, Vincent, University of California at San Diego  
Nikiforakis, Nikos, New York University Abu Dhabi  
Nikolaev, Valeri, University of Chicago  
Ning, Jie, Case Western Reserve University  
Nini, Greg, Drexel University  
Nittala, Lakshmi, University of Dayton  
Nocetti, Diego, Clarkson University  
Noe, Thomas, University of Oxford  
Norden, Lars, Fundacao Getulio Vargas  
Normann, Hans-Theo, University of Duesseldorf  
Nosenzo, Daniele, University of Nottingham  
Noussair, Charles, University of Arizona  
Nurre, Sarah, University of Arkansas  
Nyugen, Hoai-Luu, University of California, Berkeley  
Oakley, Jeremy, University of Sheffield  
Obloj, Tomasz, HEC Paris  
Ockenfels, Axel, University of Cologne  
Odean, Terrance, University of California, Berkeley

## 2017 – All Reviewers

O'Donoghue, Shawn, US Securities and Exchange Commission  
Oery, Aniko, Yale University  
Oesch, David, University of Zurich  
Oettl, Alex, Georgia Institute of Technology  
Oeystein, Daljord, University of Chicago  
Officer, Micah, Loyola Marymount University  
Ogneva, Maria, University of Southern California  
Oh, Sechan, Moloco  
Oh, Sewing, University of Illinois at Urbana-Champaign  
Oh, Wonseok, Korea Advanced Institute of Science and Technology  
Ohyama, Atsushi, Hitotsubashi Daigaku  
Okimoto, Tyler, University of Queensland  
Olds, Gareth, Harvard Business School  
Oler, Derek, Texas Tech University  
Olivola, Christopher, Carnegie Mellon University  
Ongena, Steven, University of Zurich  
Opp, Christian, University of Pennsylvania  
Oppenheimer, Danny, University of California, Los Angeles  
Oraopoulos, Nektarios, Cambridge University  
Ordonez, Lisa, University of Arizona  
Orhun, A. Yesim, University of Michigan  
Orlov, Dmitry, University of Rochester  
Ormazabal, Gaizka, IESE Business School  
Orsdemir, Adem, University of California, Riverside  
Ortiz-Molina, Hernan, University of British Columbia  
Ortmann, Andreas, University of New South Wales  
Ortoleva, Pietro, Princeton University  
Osadchiy, Nikolay, Emory University  
Osambela, Emilio, Federal Reserve Board  
Osborne, Matthew, University of Toronto  
Ostler, James, University of Michigan--Ann Arbor  
Otter, Thomas, Goethe University  
Ouimet, Paige, University of North Carolina  
Ovchinnikov, Anton, Queens University  
Ovtchinnikov, Alexei, HEC Paris  
Owens, Edward, Emory University  
Ozaltin, Osman, North Carolina State University  
Ozbas, Oguzhan, University of Southern California  
Ozdagli, Ali, Federal Reserve Bank of Boston  
Ozer, Ozalp, University of Texas at Dallas  
Oztekin, Ozde, Florida International University  
Pachamanova, Dessislava, Babson College  
Pacheco-de-Almeida, Gonçalo, HEC Paris  
Pachur, Thorsten, Max-Planck-Institut für Bildungsforschung  
Paciorek, Andrew, Federal Reserve Board  
Page, Jeremy, Brigham Young University  
Page, Lionel, Queensland University of Technology  
Pagel, Michaela, Columbia University  
Pagnotta, Emiliano, Imperial College London  
Palazzo, Bernardino, Boston University  
Palia, Darius, Rutgers Business School  
Palley, Asa, Indiana University Bloomington  
Palmeira, Mauricio, Sungkyunkwan University  
Palmer, Christopher, University of California, Berkeley  
Palomeras, Neus, Universidad Carlos III  
Pan, Siqi, The Ohio State University  
Pan, Xiajun, University of Florida  
Pan, Yang, Louisiana State University  
Pandelaere, Mario, Virginia Tech  
Pang, Min-Seok, Temple University  
Pang, Zhan, City University of Hong Kong  
Panico, Claudio, Bocconi University  
Paoella, Lionel, University of Cambridge  
Papanastasiou, Yiannos, University of California, Berkeley  
Parakhonyak, Alexei, University of Oxford  
Paraschiv, Corina, Universite Paris Descartes  
Park, So-Eun, University of British Columbia  
Parker, Christopher, Pennsylvania State University  
Parlaktürk, Ali, University of North Carolina at Chapel Hill  
Parlour, Christine, University of California, Berkeley  
Parmigiani, Anne, University of Oregon  
Pasch, Stefan, Goethe University Frankfurt  
Pascual, Roberto, University of the Balearic Islands  
Pataconi, Andrea, University of East Anglia  
Patatoukas, Panos, University of California, Berkeley  
Patel, Mitesh, University of Pennsylvania  
Patrick, Jonathan, University of Ottawa

## 2017 – All Reviewers

Pauwels, Koen, Northeastern University  
Pavlin, Michael, Wilfrid Laurier University  
Pavlov, Valery, University of Auckland  
Payne, Richard, Cass Business School  
Pedraza-Martinez, Alfonso, Indiana University  
Bloomington  
Peijnenburg, Kim, HEC Paris  
Pekeč, Saša, Duke University  
Pelizzon, Loriana, Università Ca' Foscari Venezia  
Pelletier, Denis, North Carolina State University  
Penczynski, Stefan, University of Mannheim  
Peng, Jing, University of Pennsylvania  
Peng, Xianhua, Hong Kong University of Science  
and Technology  
Pennacchi, George, University of Illinois  
Perdikaki, Olga, University of South Carolina  
Perez-Truglia, Ricardo, University of California,  
Los Angeles  
Perry, Ohad, Northwestern University  
Persson, Lars, Research Institute of Industrial  
Economics  
Petacchi, Reining, Georgetown University  
Peter, Richard, University of Iowa  
Petersen, J., Pennsylvania State University  
Peterson, Kyle, University of Oregon  
Petriconi, Silvio, Bocconi University  
Pettibone, Jonathan, Southern Illinois University  
Edwardsville  
Peysakhovich, Alexander, Facebook  
pfattheicher, Stefan, University of Ulm  
Phalippou, Ludo, University of Oxford  
Pham, Peter, University of New South Wales  
Phan, Tuan, National University of Singapore  
Philipov, Alexander, George Mason University  
Phillips, Blake, University of Waterloo  
Phillips, Gordon, Dartmouth College  
Piacentino, Giorgia, Washington University in  
Saint Louis  
Piatti, Ilaria, University of Oxford  
Piccolo, Salvatore, Catholic University of Milan  
Pikulina, Elena, University of British Columbia  
Pin, Paolo, Bocconi University  
Pinar, Mustafa, Bilkent University  
Pixton, Clark, Massachusetts Institute of  
Technology  
Pizzini, Mina, Texas State University  
Placido, Laetitia, Baruch College  
Plassman, Hilke, INSEAD  
Plazzi, Alberto, University of Lugano  
Pleskac, Timothy, Michigan State University  
Ploner, Matteo, University of Trento  
Plosser, Matthew, Federal Reserve Bank of New  
York  
Plueger, Carolin, University of British Columbia  
Pollet, Joshua, University of Illinois  
Polman, Evan, University of Wisconsin-Madison  
Pontikes, Elizabeth, University of Chicago  
Popescu, Dana, University of Virginia  
Popov, Sergey, Queen's University  
Porchia, Paolo, IE Business School  
Poschke, Markus, McGill University  
Post, Thierry, Koç University  
Post, Thomas, Maastricht University  
Postek, Krzysztof, Technion Israel Institute of  
Technology  
Powell, Mike, Northeastern University  
Pozner, Jo-Ellen, Santa Clara University  
Prelec, Drazen, Massachusetts Institute of  
Technology  
Price, Joseph, Brigham Young University  
Price, Paul, California State University, Fresno  
Prince, Jeffrey, Indiana University  
Proserpio, Davide, University of Southern  
California  
Prowse, Victoria, Purdue University  
Pruitt, Seth, Arizona State University  
Puckett, Andy, University of Tennessee  
Pukthuanthong, Kuntara, University of Missouri  
Puri, Manju, Duke University  
Purnanandam, Amiyatosh, University of  
Michigan  
Purohit, Debu, Duke University  
Qi, Anyan, The University of Texas at Dallas  
Qi, Yaxuan, City University of Hong Kong  
Qian, Meijun, Australian National University  
Qian, Wenlan, National University of Singapore  
Qian, Yi, National Bureau of Economic Research  
Qian, Yiming, University of Iowa  
Qiu, Liangfei, University of Florida  
Quinn, Phil, University of Washington  
Raasch, Christina, Kuhne Logistics University  
Rader, Christina, Colorado College  
Radzevick, Joe, Gettysburg College  
Rahmandad, Hazhir, Massachusetts Institute of  
Technology

## 2017 – All Reviewers

Rahmani, Morvarid, Georgia Institute of Technology  
Raith, Michael, University of Rochester  
Rajan, Uday, University of Michigan  
Ramachandran, Karthik, Georgia Institute of Technology  
Ramalingegowda, Santhosh, University of Georgia  
Ramaprasad, Jui, McGill University  
Rand, William, North Carolina State University  
Ranehill, Eva, University of Zurich  
Ranganathan, Aruna, Stanford University  
Ranganathan, Ram, University of Texas at Austin  
Ransbotham, Sam, Boston College  
Rao, Anita, Stanford University  
Rao, Gautam, Harvard University  
Rapach, David, Saint Louis University  
Ray, Gautam, University of Minnesota  
Ray, Korok, Texas A&M University  
Ready, Robert, University of Rochester  
Recalde, Maria, International Food Policy Research Institute  
Reck, Daniel, University of California, Berkeley  
Reeb, David, National University of Singapore  
Reed, Josh, New York University  
Rees-Jones, Alex, Cornell University  
Rees-Jones, Alex, University of Pennsylvania  
Regnier, Eva, Naval Postgraduate School  
Rego, Sonja, Indiana University  
Reichman, Shachar, Tel Aviv University  
Reid, Erin, McMaster University  
Reiley, David, Pandora  
Reisinger, Markus, Frankfurt School of Finance & Management  
Reme, Bjørn-Atle, Telenor Research  
Ren, Yufei, Union College  
Renneboog, Luc, Tilburg University  
Renucci, Antoine, Université Paris-Dauphine  
Repullo, Rafael, Centro de Estudios Monetarios y Financieros  
Reschke, Brian, Brigham Young University  
Resutek, Robert, University of Georgia  
Retana, German, INCAE Business School  
Reuben, Ernesto, New York University  
Reuter, Jonathan, Boston College  
Rey Biel, Pedro, Autonomous University of Barcelona  
Reza, Sadat, Nanyang Technological University  
Rhodes, Andrew, Toulouse School of Economics  
Richardson, Vernon, University of Arkansas  
Richter, Brian, University of Texas at Austin  
Rick, Scott, University of Michigan  
Rider, Christopher, Georgetown University  
Ridley, David, Duke University  
Riedel, Frank, Bielefeld University  
Riedl, Arno, Maastricht University  
Riedl, Christoph, Northeastern University  
Riedl, Eddie, Harvard Business School  
Riener, Gerhard, University of Düsseldorf  
Rieskamp, Joerg, University of Basel  
Rindi, Barbara, Bocconi University  
Rindisbacher, Marcel, Boston University  
Ringgenberg, Matthew, University of Utah  
Rink, Floor, University of Groningen  
Riordan, Ryan, Queen's University  
Rios, Luis, Duke University  
Rissing, Ben, Cornell University  
Roach, Michael, Cornell University  
Robinson, Jonathan, University of Southern California  
Rock, Daniel, Massachusetts Institute of Technology  
Rockart, Scott, Duke University  
Rockenbach, Bettina, University of Cologne  
Rodriguez-Lara, Ismael, Middlesex University  
Roels, Guillaume, INSEAD  
Roende, Thomas, Copenhagen Business School  
Roessler, Christian, California State University, East Bay  
Roet-Green, Ricky, William E Simon Graduate School of Business  
Rogers, Jonathan, University of Colorado  
Rogers, Todd, Harvard University  
Rogo, Rafael, University of British Columbia  
Rohde, Ingrid, Maastricht University  
Roijsers, Diederik, Vrije Universiteit Brussel  
Romanosky, Sasha, RAND Corporation  
Romero, Gonzalo, University of Toronto  
Romley, John, University of Southern California  
Rong, Ying, Shanghai Jiaotong University  
Roos, Jason, Erasmus University  
Rosenbaum, Mathieu, University Pierre and Marie Curie  
Rosenbaum, Ted, Federal Trade Commission  
Rosokha, Yaroslav, Purdue University

## 2017 – All Reviewers

Ross, David, University of Florida  
Rossi, Alberto, University of Maryland, College Park  
Rossi, Stefano, Bocconi University  
Rossman, Gabriel, University of California, Los Angeles  
Rosu, Ioanid, HEC Paris  
Roth, Lukas, University of Alberta  
Rott, Christina, Maastricht University  
Roulstone, Darren, Ohio State University  
Rountree, Brian, Rice University  
Rubel, Olivier, University of California, Davis  
Rubineau, Brian, McGill University  
Ruchti, Thomas, Carnegie Mellon University  
Rucker, Derek, Northwestern University  
Ruenzi, Stefan, University of Mannheim  
Ruffle, Bradley, Wilfrid Laurier University  
Rui, Huaxia, University of Rochester  
Rui, Oliver, China Europe International Business School  
Ruiz-Aliseda, Francisco, Pontificia Universidad Católica de Chile  
Rujeerapaiboon, Napat, Ecole Polytechnique Fédérale de Lausanne  
Rutz, Oliver, Yale University  
Ryan, Chris, University of Chicago  
Ryan, Nicholas, Yale University  
Ryu, Young, The University of Texas at Dallas  
Ryvkin, Dmitry, Florida State University  
Ryzhov, Ilya, University of Maryland, College Park  
Saavedra, Daniel, University of California, Los Angeles  
Saban, Daniela, Stanford University  
Saccardo, Silvia, Carnegie Mellon University  
Sadhu, Santu, National Opinion Research Center  
Sadka, Gil, University of Texas at Dallas  
Sadka, Ronnie, Boston College  
Sadoff, Sally, University of California, San Diego  
Sadun, Raffaella, Harvard University  
Safadi, Hani, University of Georgia  
Saghafian, Soroush, Harvard University  
Saglam, Mehmet, Princeton University  
Saglam, Mehmet, University of Cincinnati  
Sah, Sunita, Cornell University  
Saha, Rajib, Indian School of Business  
Sahin, Ozge, Johns Hopkins University  
Sahni, Navdeep, Stanford University  
Sahoo, Nachiketa, Boston University  
Saidi, Farzad, Handelshogskolan i Stockholm  
Sainathan, Arvind, Nanyang Technological University  
Saint-Jacques, Guillaume, Massachusetts Institute of Technology  
Sakakibara, Mariko, University of California, Los Angeles  
Sakhartov, Arkadiy, University of Pennsylvania  
Salge, Carolina, University of Georgia  
Salo, Ahti, Aalto University School of Business  
Salomon, Robert, New York University  
Samek, Anya, University of Southern California  
Samila, Sampsa, IESE Business School  
Sandberg, Anna, Institute for International Economic Studies  
Sandikci, Burhaneddin, University of Chicago  
Sandino, Tatiana, Harvard University  
Sangiorgi, Francesco, Stockholm School of Economics  
Sankaranarayanan, Ram, New York University  
Santalo, Juan, IE Business School  
Santos-Pinto, Luis, University of Lausanne  
Sanyal, Pallab, George Mason University  
Sarada, University of Wisconsin-Madison  
Sara, Krista, Webster University Geneva  
Saraniti, Brett, Northeastern University  
Saretto, Alessio, University of Texas at Dallas  
Sarkissian, Sergei, McGill University  
Sauermann, Henry, European School of Management and Technology  
Sauermann, Jan, Stockholm University  
Saunders, Adam, University of British Columbia  
Saure, Denis, University of Pittsburgh  
Sausgruber, Rupert, University of Innsbruck  
Sautner, Zacharias, Frankfurt School of Finance & Management  
Savasneril, Secil, Middle East Technical University  
Savaskan, Canan, Southern Methodist University  
Savaskan-Ebert, R. Canan, Southern Methodist University  
Savor, Pavel, Temple University  
Savva, Nicos, London Business School  
Sayedi, Amin, University of Washington  
Scarsini, Marco, Libera Università Internazionale degli Studi Sociali

## 2017 – All Reviewers

Schaefer, Andrew, Rice University  
Schaner, Simone, Dartmouth College  
Schindler, David, Ludwig Maximilian University of Munich  
Schivardi, Fabiano, Einaudi Institute for Economics and Finance  
Schlafmann, Kathrin, Stockholm University  
Schliephake, Eva, University of Bonn  
Schlingemann, Frederik, University of Pittsburgh  
Schloetzer, Jason, Georgetown University  
Schmalz, Martin, University of Michigan  
Schmedders, Karl, University of Zurich  
Schmid, Lukas, Duke University  
Schmid, Markus, University of St. Gallen  
Schmidbauer, Eric, University of Central Florida  
Schmidt, William, Cornell University  
Schnedler, Wendelin, University of Paderborn  
Schneemeier, Jan, Indiana University  
Schneider, Henry, Cornell University  
Schneider, Mark, Chapman University  
Schneider, Matthew, Drexel University  
Schoetzer, Jason, Georgetown University  
Scholten, Marc, Universidade Europeia  
Scholtes, Stefan, University of Cambridge  
Schonlau, Rob, Brigham Young University  
Schöttner, Anja, Humboldt University Berlin  
Schrift, Rom, University of Pennsylvania  
Schroth, Enrique, Cass Business School  
Schudy, Simeon, Ludwig Maximilian University of Munich  
Schuett, Florian, Tilburg University  
Schultz, Kenneth, Air Force Institute of Technology  
Schunk, Daniel, University of Mainz  
Schwartz, David, Northwestern Law School  
Schwartz, Eric, University of Michigan  
Schwartz-Ziv, Miriam, Michigan State University  
Schweidel, David, Georgetown University  
Schwenkler, Gustavo, Boston University  
Schwert, Michael, Fisher College of Business  
Schwieren, Christiane, University of Heidelberg  
Scopelliti, Irene, City University London  
Scott, Sydney, Washington University in St. Louis  
Scur, Daniela, University of Oxford  
Seamans, Robert, New York University  
Sefton, Martin, University of Nottingham  
Segal, Gill, University of North Carolina at Chapel Hill  
Seidel, Timothy, Brigham Young University  
Seifert, Matthias, IE Business School  
Seifried, Frank, University of Kaiserslautern  
Seiler, Stephan, Stanford University  
Seim, Katja, University of Pennsylvania  
Seira, Enrique, Instituto Tecnológico Autónomo de México  
Selove, Matthew, Chapman University  
Sen, Ananya, Massachusetts Institute of Technology  
Sen, Anup, Indian Institute of Management Calcutta  
Sen, Rik, UNSW Australia  
Sen, Soumya, University of Minnesota  
Sengul, Metin, Boston College  
Senot, Claire, Tulane University  
Serafeim, George, Harvard University  
Serfes, Konstantinos, Drexel University  
Serpa, Juan, McGill University  
Serra, Danila, Southern Methodist University  
Serra-Garcia, Marta, University of California, San Diego  
Serrano, Carlos, Pompeu Fabra University  
Sertsios, Giorgio, Universidad de los Andes  
Servaes, Henri, London Business School  
Sethuraman, Jay, Columbia University  
Sette, Enrico, Bank of Italy  
Severino, Felipe, Dartmouth College  
Sevilir, Merih, Indiana University  
Seyhun, Nejat, University of Michigan  
Sezer, Ovul, University of North Carolina at Chapel Hill  
Shaikh, Maha, London School of Economics and Political Science  
Shakespeare, Catherine, University of Michigan  
Shaliastovich, Ivan, University of Pennsylvania  
Shalvi, Shaul, University of Amsterdam  
Shamir, Naom, Tel Aviv University  
Shane, Scott, Case Western Reserve University  
Shankar, Venky, Texas A&M University  
Shanthikumar, J. George, Purdue University  
Shantikumar, Devin, University of California, Irvine  
Shao, Lusheng, The University of Melbourne  
Shapira, Daniel, Ben-Gurion University of the Negev

## 2017 – All Reviewers

Shapiro, Alexander, Georgia Tech  
Shapiro, Bradley, University of Chicago  
Shapiro, Joel, University of Oxford  
Sharkey, Amanda, University of Chicago  
Sharp, Nathan, Texas A&M University  
Sheldon, Oliver, Rutgers University  
Shen, Haipeng, University of Hong Kong  
Shen, Jianfeng, University of New South Wales  
Shen, Luxi, Chinese University of Hong Kong  
Shen, Qiaowei, Peking University  
Shen, Siqian, University of Michigan  
Shen, Zuo-Jun, University of California, Berkeley  
Shenoy, jaideep, University of Connecticut  
Sheremeta, Roman, Case Western Reserve University  
Sherman, Eliot, London Business School  
Shi, Cong, University of Michigan  
Shi, Mengze, University of Toronto  
Shi, Pengyi, Purdue University  
Shi, Yuan, University of Maryland, College Park  
Shi, Zhan (Michael), Arizona State University  
Shin, Dongwook, Hong Kong University of Science and Technology  
Shin, Hyoduk, University of California, San Diego  
Shin, Jiwoong, Yale University  
Shin, Woochoel, University of Florida  
Shive, Sophie, University of Notre Dame  
Shivendu, Shivendu, University of South Florida  
Shkilko, Andriy, Wilfrid Laurier University  
Shlain, Avner, University of California, Berkeley  
Shogren, Jason, University of Wyoming  
Shohfi, Thomas, Rensselaer Polytechnic Institute  
Shriver, Scott, Columbia University  
Shroff, Nemit, Massachusetts Institute of Technology  
Shroff, Pervin, University of Minnesota Twin Cities  
Shu, Jia, Southeast University  
Shu, Pian, Georgia Institute of Technology  
Shu, Susan, Boston college  
Shugan, Steven, University of Florida  
Shulman, Jeffrey, University of Washington  
Shum, Stephen, City University of Hong Kong  
Shumway, Tyler, University of Michigan  
Shunko, Masha, University of Washington  
Shurchkov, Olga, Wellesley College  
Sialm, Clemens, University of Texas at Austin  
Sias, Richard, University of Arizona  
Sibilkov, Valeriy, University of Wisconsin-Milwaukee  
Siegel, Jordan, University of Michigan  
Siegel, Stephan, University of Washington  
Siemens, Enno, University of Minnesota  
Silberholz, John, University of Michigan  
Silva, Rui, London Business School  
Simin, Timothy, Pennsylvania State University  
Simintzi, Elena, The University of British Columbia  
Simmons, Joseph, University of Pennsylvania  
Simon, Daniel, Indiana University  
Simonato, Jean-Guy, HEC Montreal  
Simonelli, Saveri, University of Naples Federico II  
Simonov, Andrey, Columbia University  
Simonsohn, Uri, University of Pennsylvania  
Simsek, A. Serdar, University of Texas at Dallas  
Simutin, Mikhail, University of Toronto  
Singh, Harpreet, The University of Texas at Dallas  
Singh, Rajendra, University of South Carolina  
Singh, Shubhranshu, Johns Hopkins University  
Sirignano, Justin, University of Illinois at Urbana-Champaign  
Sismeiro, Catarina, Imperial College London  
Sivadasan, Jagadeesh, University of Michigan  
Skeie, David, Texas A&M University  
Skiadopoulos, George, University of Piraeus  
Skreta, Vasiliki, New York University  
Sletten, Ewa, Boston College  
Slikker, Marco, Technische Universiteit Eindhoven  
Slivkins, Aleksandrs, Microsoft Research  
Slivko, Olga, Centre for European Economic Research  
Sliwka, Dirk, University of Cologne  
Smeets, Paul, Maastricht University  
Smith, Erin, US Securities and Exchange Commission  
Smith, J. Cole, Clemson University  
Smith, John, Indiana University  
Smith, John, Rutgers University-Camden  
Smith, Sarah, Bristol University  
Snyder, Jason, University of Utah  
Snyder, Larry, Lehigh University  
So, Eric, Massachusetts Institute of Technology

## 2017 – All Reviewers

Soberman, David, University of Toronto  
Soderstrom, Naomi, University of Melbourne  
Soderstrom, Sara, University of Michigan  
Sodhi, ManMohan, Cass Business School  
Sodomka, Eric, Facebook  
Soetevent, Adriaan, University of Groningen  
Sojli, Elvira, UNSW Australia  
Soliman, Mark, University of Southern California  
Soll, Jack, Duke University  
Solomon, David, Boston College  
Soltis, Eugene, Harvard Business School  
Soman, Dilip, University of Toronto  
Somanchi, Sriram, University of Notre Dame  
Sommer, Svenja, HEC Paris  
Somville, Vincent, Norges Handelshoyskole  
Song, Hummy, University of Pennsylvania  
Song, Inseong, Seoul National University  
Song, Qingshuo, City University of Hong Kong  
Song, Yicheng, University of Minnesota in Minneapolis  
Sonnier, Garrett, University of Texas at Austin  
Soo, Cindy, University of Michigan  
Sørensen, Erik, Norwegian School of Economics  
Sorescu, Alina, Texas A&M University  
Sorescu, Sorin, Texas A&M University  
Sosa, Manuel, INSEAD  
Souza, Gilvan, Indiana University  
Sovinsky, Michelle, University of Mannheim  
Soyer, Refik, George Washington University  
Soysal, Gonca, University of Arkansas  
Spagnolo, Giancarlo, SITE Stockholm School of Economics  
Spalt, Oliver, Tilburg University  
Spantig, Lisa, University of Munich  
Spiegel, Yossi, Tel Aviv University  
Sridharan, Suhas, Emory University  
Srikanth, Kannan, Singapore Management University  
Srinivasan, Anand, National University of Singapore  
Srinivasan, Shuba, Boston University  
Sriram, S., University of Michigan  
Srivastava, Anup, Dartmouth College  
Srivastava, Joydeep, Temple University  
Srivastava, Sameer, University of California, Berkeley  
Srivastava, Shirish C., HEC Paris  
Staats, Bradley, University of North Carolina at Chapel Hill  
Stamatopoulos, Ioannis, University of Texas at Austin  
Stanton, Christopher, University of Utah  
Starr, Evan, University of Maryland, College Park  
Stathopoulos, Andreas, University of Washington  
Stecher, Jack, University of Alberta  
Steffen, Thomas, Yale University  
Stegemoller, Michael, Baylor University  
Steiny, Alex, University of California, Berkeley  
Stentoft, Lars, University of Western Ontario  
Stepanov, Sergey, Higher School of Economics  
Stephen, Andrew, University of Oxford  
Steri, Roberto, Universite de Lausanne  
Sterling, Adina, Stanford University  
Serman, John, Massachusetts Institute of Technology  
Stern, Lea, University of Washington  
Stern, Ariel, Harvard Business School  
Stettner, Uriel, Tel Aviv University  
Sting, Fabian, University of Cologne  
Stocken, Phillip, Dartmouth College  
Stoffman, Noah, Indiana University  
Stoikov, Sasha, Cornell University  
Stolin, David, Toulouse Business School  
Stone, Arthur, University of Southern California  
Stone, Eric, Wake Forest University  
Stoop, Jan, Erasmus University Rotterdam  
Stoughton, Neal, Wirtschaftsuniversität Wien  
Stourm, Valeria, HEC Paris  
Strack, Philipp, University of California, Berkeley  
Strahan, Phil, Boston College  
Strobl, Günter, Frankfurt School of Finance & Management  
Stroube, Bryan, London Business School  
Stubben, Stephen, University of Utah  
Sturgess, Jason, Queen Mary University of London  
Suarez, Gustavo, Federal Reserve Board  
Subramani, Mani, University of Minnesota  
Subramanian, Ajay, Georgia State University  
Subramanian, Hemang, Florida International University  
Subramanian, Krishnamurthy, Indian School of Business

## 2017 – All Reviewers

Subramanian, Upender, University of Texas at Dallas  
Subramanyam, Ramanath, University of Illinois at Urbana-Champaign  
Sudbury, Austin, Carnegie Mellon University  
Suetens, Sigrid, Tilburg University  
Sugden, Robert, University of East Anglia  
Suijs, Jeroen, Tilburg University  
Sulaeman, Johan, National University of Singapore  
Sun, Amy, University of Houston  
Sun, Baohong, Cheung Kong Graduate School of Business  
Sun, Estelle, Boston University  
Sun, Haoying, Texas A&M University  
Sun, Heshan, Clemson University  
Sun, Monic, Boston University  
Sun, Peng, Duke University  
Sun, Tianshu, University of Southern California  
Sun, Zheng, University of California, Irvine  
Sunar, Nur, North Carolina University at Chapel Hill  
Sunder, Jayanthi, University of Arizona  
Sunderam, Adi, Harvard Business School  
Suominen, Matti, Aalto University School of Business  
Sutherland, Andrew, Massachusetts Institute of Technology  
Swaminathan, Anand, Emory University  
Swaminathan, Jayashankar, University of North Carolina  
Sydnor, Justin, University of Wisconsin  
Szech, Nora, Karlsruhe Institute of Technology  
Szydlowski, Martin, University of Minnesota  
Tabakovic, Haris, Harvard Business School  
Tadelis, Steve, University of California, Berkeley  
Tafti, Ali, University of Illinois at Chicago  
Tag, Joacim, Research Institute of Industrial Economics  
Tahbaz-Salehi, Alireza, Northwestern University  
Taillard, Jerome, Babson College  
Tallon, Jean-Marc, Ecole d'economie de Paris  
Tambe, Prasanna, New York University  
Tamoni, Andrea, London School of Economics and Political Science  
Tan, David, University of Washington  
Tan, Liang, George Washington University  
Tan, Samuel, University of California, Berkeley  
Tan, Tarkan, Eindhoven University of Technology  
Tan, Tom, Southern Methodist University  
Tan, Xue, University of Washington  
Tan, Yinliang, Tulane University  
Tandon, Vivek, National University of Singapore  
Taneri, Niyazi, National University of Singapore  
Tang, Dragon, University of Hong Kong  
Tang, Hongfei, Seton Hall University  
Tang, Michael, New York University  
Tang, Sammi, University of Miami  
Tang, Xinlin, Florida State University  
Tanlu, Lloyd, Northeastern University  
Tarantino, Emanuele, University of Mannheim  
Tarraso, Jorge, University of Southern California  
Tasoff, Joshua, Claremont Graduate University  
Tatarynowicz, Adam, Singapore Management University  
Taylor, Daniel, University of Pennsylvania  
Taylor, Greg, University of Oxford  
Taylor, Lucian, University of Pennsylvania  
Taylor, Sean, New York University  
Tchisty, Alexei, University of Illinois at Urbana-Champaign  
Tebbs, Joshua, University of South Carolina  
Tellis, Gerard, University of Southern California  
Tenney, Elizabeth, University of Utah  
Teodoridis, Florenta, University of Southern California  
Teoh, Siew Hong, University of California, Irvine  
Tereyagoglu, Necati, Georgia Institute of Technology  
Terlaak, Ann, University of Wisconsin-Madison  
Tham, Mandy, Nanyang Technological University  
Thamm, Juliane, University of Strathclyde  
Thiele, Aurelie, Southern Methodist University  
Thiele, Veikko, Queen's University  
Thoeni, Christian, University of Lausanne  
Thomas, Catherine, London School of Economics and Political Science  
Thomas, Shawn, University of Pittsburgh  
Thompson, Neil, Massachusetts Institute of Technology  
Thompson, Peter, Emory University  
Thonemann, Ulrich, University of Cologne  
Thorburn, Karin, Norwegian School of Economics

## 2017 – All Reviewers

Thornock, Jacob, University of Washington  
Tian, Feng, University of Michigan  
Tian, Weidong, University of North Carolina at Charlotte  
Tian, Xuan, Indiana University  
Tilcsik, Andras, University of Toronto  
Tilson, Vera, University of Rochester  
Tinsley, Catherine, Georgetown University  
Tirunillai, Seshadari, University of Houston  
Tiwana, Amrit, University of Georgia  
Todri, Vilma, Emory University  
Toffel, Michael, Harvard Business School  
Tolbert, Pam, Cornell University  
Tong, Jordan, University of Wisconsin-Madison  
Tong, Lin, Fordham University  
Tong, Qing, Singapore Management University  
Tong, Shilu, Hong Kong University of Science and Technology  
Tongarlak, Mustafa, Bogazici University  
Tonin, Mirco, Libera Università di Bolzano  
Topaloglu, Huseyin, Cornell University  
Toplak, Maggie, York University  
Torgler, Benno, Queensland University of Technology  
Toriello, Alejandro, Georgia Institute of Technology  
Tost, Leigh, University of Southern California  
Toussaert, Severine, New York University  
Townsend, Richard, University of California, San Diego  
Treich, Nicolas, University of Toulouse  
Trichakis, Nikolaos, Massachusetts Institute of Technology  
Trigilia, Giulio, William E Simon Graduate School of Business  
Tripodi, Egon, European University Institute  
Trivedi, Minakshi, State University of New York at Buffalo  
Trojani, Fabio, University of Geneva  
Trueblood, Jennifer, Vanderbilt University  
Truong, Van-Anh, Columbia University  
Trusov, Michael, University of Maryland, College Park  
Tsang, Albert, York University  
Tsetlin, Ilia, INSEAD  
Tsetsos, Konstantinos, Universitätsklinikum Hamburg Eppendorf Zentrum für Experimentelle Medizin  
Tsolmon, Ulya, Washington University in Saint Louis  
Tsoukalas, Gerry, University of Pennsylvania  
Tsoutsoura, Margarita, University of Chicago  
Tsoy, Anton, Einaudi Institute for Economics and Finance  
Tsui, David, University of Southern California  
Tsyplakov, Sergey, University of South Carolina  
Tu, Jun, Singapore Management University  
Tuchman, Anna, Northwestern University  
Tucker, Anita, Boston University  
Tucker, Jennifer, University of Florida  
Tulabandhula, Theja, University of Illinois at Chicago  
Tuli, Kapil, Singapore Management University  
Tunca, Tunay, University of Maryland, College Park  
Tungodden, Jonas, University of California, Berkeley  
Turcic, Danko, Washington University in St. Louis  
Turel, Ofir, California State University, Fullerton  
Turner, John, University of Georgia  
Turocy, Theodore, University of East Anglia  
Türtscher, Philipp, VU Amsterdam  
Twedt, Brady, Indiana University  
Twite, Garry, University of Melbourne  
Tyagi, Rajeev, University of California, Irvine  
Tzeng, Larry, National Taiwan University  
Uetake, Kosuke, Yale University  
Uhan, Nelson, United States Naval Academy  
Uichanco, Joline, University of Michigan  
Uler, Neslihan, University of Michigan  
Ulku, Sezer, Georgetown University  
Ulu, Canan, Georgetown University  
Umyarov, Akhmed, University of Minnesota  
Unsworth, Kerrie, University of Leeds  
Unzueta, Miguel, University of California, Los Angeles  
Uppal, Raman, EDHEC Business School  
Uppari, Bhavani Shanker, INSEAD  
Urcan, Oktay, University of Illinois at Urbana-Champaign  
Urminsky, Oleg, University of Chicago  
Urosevic, Branko, University of Belgrade  
Uysal, Pinar, Federal Reserve Bank of Richmond  
Vafeas, Nikos, University of Cyprus  
Vakili, Keyvan, London Business School

## 2017 – All Reviewers

Valdes, Leon, University of Pittsburgh  
Valentini, Giovanni, Universidad de Navarra IESE Business School  
Valletti, Tommaso, Imperial College London  
Van Binsbergen, Jules, University of Pennsylvania  
van Bommel, Jos, University of Luxembourg  
Van Buskirk, Andrew, Ohio State University  
van de Kuilen, Gijs, Erasmus University  
Van den Abbeele, Alexandra, Katholieke Universiteit Leuven  
van den Assem, Martijn, VU Amsterdam  
Van den Bulte, Christophe, University of Pennsylvania  
van der Lans, Ralf, Hong Kong University of Science and Technology  
van der Ploeg, Rick, University of Oxford  
van der Weele, Joel, Universiteit van Amsterdam  
van Dijk, Mathijs, Erasmus University  
Van Houtum, Geert-Jan, Eindhoven University of Technology  
van Praag, Mirjam, Copenhagen Business School  
van Soest, Daan, Tilburg University  
Van Swol, Lyn, University of Wisconsin-Madison  
van Veldhuizen, Roel, WZB Berlin  
Van Wesep, Edward, University of Colorado  
Van Zant, Alex, University of California, Berkeley  
van Zeebroeck, Nicolas, Université libre de Bruxelles  
Vana, Prasad, London Business School  
Vanneste, Bart, University College London  
Varas, Felipe, Duke University  
Vasnev, Andrey, University of Sydney  
Vasquez, Aurelio, Instituto Tecnológico Autónomo de México  
Vasvari, Florin, London Business School  
Vaze, Vikrant, Dartmouth College  
Vedolin, Andrea, London School of Economics and Political Science  
Vega, Clara, Federal Reserve Board  
Venkataraman, Kumar, Southern Methodist University  
Venkatesan, Rajkumar, University of Virginia  
Venkateswaran, Anand, Northeastern University  
Veraart, Luitgard, London School of Economics and Political Science  
Verdelhan, Adrien, Massachusetts Institute of Technology  
Verhaal, J, Georgia State University  
Verhoef, Peter, University of Groningen  
Verhoeven, Dennis, University of Leuven  
Verwijmeren, Patrick, Erasmus University Rotterdam  
Vestman, Roine, Stockholm University  
Vidal, Elena, Baruch College  
Vieider, Ferdinand, University of Reading  
Vigerske, Stefan, GAMS Software GmbH  
Vilkov, Grigory, Frankfurt School of Finance & Management  
Villalonga, Belen, New York University  
Villeneuve, Stephane, Toulouse School of Economics  
Virag, Gabor, University of Toronto  
Viswanathan, Madhu, University of Arizona  
Vladimirov, Vladimir, University of Amsterdam  
Vlassopoulos, Michael, University of Southampton  
Volchkova, Natalia, New Economic School  
Vollan, Björn, University of Innsbruck  
von Essen, Emma, University of Aarhus  
Von Lilienfeld-Toal, Ulf, University of Luxembourg  
von Schedvin, Erik, Sveriges Riksbank  
von Siemens, Ferdinand, University of Frankfurt  
Vosgerau, Joachim, Bocconi University  
Vuilleme, Guillaume, HEC Paris  
Vulcano, Gustavo, Universidad Torcuato Di Tella  
Vulkan, Nir, University of Oxford  
Vyas, Dushyantkumar, University of Toronto  
Wade, James, George Washington University  
Wagalath, Lakshitha, IESEG School of Management  
Wagenhofer, Alfred, University of Graz  
Wager, Stefan, Stanford University  
Wagman, Liad, Illinois Institute of Technology  
Wagner, Michael, University of Washington  
Wagner, Stefan, European School of Management and Technology  
Waguespack, David, University of Maryland, College Park  
Wahid, Aida, University of Toronto  
Wahlen, James, Indiana University  
Waiser, Robert, University of Toronto  
Wakker, Peter, Erasmus University

## 2017 – All Reviewers

Walasek, Lukasz, University of Warwick  
Wald, John, University of Texas at San Antonio  
Waldinger, Fabian, University of Warwick  
Walker, Dylan, Boston University  
Wallace, Scott, Duke University  
Walther, Ansgar, University of Warwick  
Walton, Neil, University of Manchester  
Wan, Chi, University of Massachusetts Boston  
Wan, Zhixi, University of Oregon  
Wang, Baolian, Fordham University  
Wang, Carmen, Harvard Business School  
Wang, Charles, Harvard Business School  
Wang, Chengsi, University of Mannheim  
Wang, Chong (Alex), Peking University  
Wang, Clare, Northwestern University  
Wang, Cong, China Europe International Business School  
Wang, Dan, Columbia University  
Wang, Dechun, Texas A&M University  
Wang, He, Georgia Institute of Technology  
Wang, Isabel, Michigan State University  
Wang, Jessie Jiaxu, Arizona State University  
Wang, Jialan, University of Illinois at Urbana-Champaign  
Wang, Jianxin, Central South University  
Wang, Jingqi, The University of Hong Kong  
Wang, Kailong, University of Florida  
Wang, Kangkang, University of Alberta  
Wang, Kangkang, Washington University in St. Louis  
Wang, Li, Case Western Reserve University  
Wang, Liao, Columbia University  
Wang, Mengdi, Princeton University  
Wang, Rong, Singapore Management University  
Wang, Ruxian, Johns Hopkins University  
Wang, Sean, University of North Carolina at Chapel Hill  
Wang, Shouqiang, University of Texas at Dallas  
Wang, Tong, National University of Singapore  
Wang, Tong, University of Iowa  
Wang, Tracy, University of Minnesota  
Wang, Wei, Queen's University  
Wang, Wenbo, Hong Kong University of Science and Technology  
Wang, Wenyu, Indiana University  
Wang, X., University of Missouri  
Wang, Xin (Shane), Western University  
Wang, Xuan, New York University  
Wang, Xue, The Ohio State University  
Wang, Yanbo, Boston University  
Wang, Yanbo, NUS Business School  
Wang, Yanwen, University of Colorado at Boulder  
Wang, Yongxiang, University of Southern California  
Wang, Yu, California State University, Long Beach  
Wang, Yulan, The Hong Kong Polytechnic University  
Wang, Zhe, Pennsylvania State University  
Wang, Zizhuo, University of Minnesota  
Wangerin, Daniel, Michigan State University  
Warachka, Mitch, University of San Diego  
Ward, Amy, University of Southern California  
Ward, Andrew, Swarthmore College  
Wardlaw, Malcolm, University of Texas at Dallas  
Warglien, Massimo, University Ca'Foscari Venezia  
Wasley, Charles, University of Rochester  
Wattal, Sunil, Temple University  
Watugala, Sumudu, Cornell University  
Webb, Alan, University of Waterloo  
Webb, Craig, University of Manchester  
Webb, Elizabeth, Columbia University  
Webb, Michael, Stanford University  
Webb, Ryan, University of Toronto  
Weber, Joseph, Massachusetts Institute of Technology  
Weber, Martin, University of Mannheim  
Weber, Michael, University of Chicago  
Weber, Roberto, University of Zurich  
Weber, Thomas, Ecole Polytechnique Fédérale de Lausanne  
Webster, Scott, Arizona State University  
Wei, Chishen, Nanyang Technological University  
Wei, Kelsey, University of Texas at Dallas  
Wei, Mike, University at Buffalo  
Wei, Yanhao, University of Southern California  
Wei, Yehua, Boston College  
Wei, Zaiyan, Purdue University  
Weigert, Florian, University of St.Gallen  
Weisbenner, Scott, University of Illinois at Urbana-Champaign  
Weiss, Dan, Tel Aviv University  
Weller, Brian, Duke University  
Welsh, David, Arizona State University

## 2017 – All Reviewers

Wen, Quan, Georgetown University  
Wen, Wen, The University of Texas at Austin  
Weng, Xi, Guanghua School of Management, Peking University  
Wengström, Erik, Lund University  
Wennberg, Karl, Stockholm School of Economics  
Werner, Peter, Maastricht University  
Werner, Timothy, University of Texas at Austin  
Westerfield, Mark, University of Washington  
Weston, James, Rice University  
Weymark, John, Vanderbilt University  
Wheelock, David, Federal Reserve Bank of St. Louis  
Whelan, Paul, Copenhagen Business School  
White, Alexander, Tsinghua University  
Wibral, Matthias, University of Bonn  
Wiecek, Margaret, Clemson University  
Wiesemann, Wolfram, Imperial College London  
Wilbur, Kenneth, University of California, San Diego  
Wildenbeest, Matthijs, Indiana University  
Wilhelm, William, University of Virginia  
Williams, Charles, Bocconi University  
Williams, Elanor, Indiana University  
Bloomington  
Williams, Heidi, Massachusetts Institute of Technology  
Williams, Jonathan, University of Georgia  
Williams, Ryan, University of Arizona  
Wilson, James, North Carolina State University  
Wilson, Ryan, University of Oregon  
Winter, Ralph, University of British Columbia  
Wittenberg-Moerman, Regina, University of Southern California  
Wiwattanakantang, Yupana, National University of Singapore  
Wolfe, Brian, State University of New York at Buffalo  
Wolk, Leonard, Vrije Universiteit Amsterdam  
Wollmann, Thomas, University of Chicago  
Wong, M.H. Franco, University of Toronto  
Wong, Maisy, University of Pennsylvania  
Wong, Yu Ting Forester, University of Southern California  
Wooders, John, University of Arizona  
Woolley, Kaitlin, Cornell University  
Wozniak, David, Eastern Michigan University  
Wu, Brian, University of Michigan--Ann Arbor  
Wu, Chunhua, University of British Columbia  
Wu, Di, University of Michigan  
Wu, Donghui, Chinese University of Hong Kong  
Wu, Eliza, University of Sydney  
Wu, Jiahua, Imperial College London  
Wu, Jianqing, University of Washington  
Wu, Jing, University of Chicago  
Wu, Julie, University of Nebraska-Lincoln  
Wu, Liuren, Baruch College  
Wu, Lynn, University of Pennsylvania  
Wu, Owen, Indiana University  
Wu, Wei, Texas A&M University  
Wu, Xiaole, Fudan University  
Wu, Yan (Diana), University of Kansas  
Wu, Yaozhong, National University of Singapore  
Wu, Youchang, University of Oregon  
Wu, Yufeng, University of Illinois at Urbana-Champaign  
Wulff, Dirk, Max-Planck-Institut für Bildungsforschung  
Xia, Han, University of Texas at Dallas  
Xiang, Yi, China Europe International Business School  
Xiao, Erte, Monash University  
Xiao, Jason, University of Rochester  
Xiao, Kairong, University of British Columbia  
Xiao, Wenli, University of San Diego  
Xiao, Wenqiang, New York University  
Xie, Fei, University of Delaware  
Xie, Hong, University of Kentucky  
Xie, Jingui, University of Science and Technology of China  
Xie, Jinhong, University of Florida  
Xie, Wei, Rensselaer Polytechnic Institute  
Xie, Xiaolan, Ecole Nationale Supérieure des Mines de Saint Etienne  
Xie, Ying, University of Texas at Dallas  
Xin, Linwei, University of Chicago  
Xin, Mingdi, University of California, Irvine  
Xing, Yuhang, Rice University  
Xu, Joseph, Carnegie Mellon University  
Xu, Guanglin, University of Iowa  
Xu, Hong, Hong Kong University of Science and Technology  
Xu, Huan, National University of Singapore  
Xu, Jin, Virginia Tech  
Xu, Keli, Indiana University

## 2017 – All Reviewers

Xu, Kuang, Massachusetts Institute of Technology  
Xu, Lai, Syracuse University  
Xu, Linli, University of Minnesota  
Xu, Lizhen, Georgia Institute of Technology  
Xu, Moqi, London School of Economics and Political Science  
Xu, Qiping, University of Notre Dame  
Xu, Sean, Tsinghua University  
Xu, Sheng-Jun, University of Alberta  
Xu, Wenxin, The Hong Kong Polytechnic University  
Xu, Yan, University of Hong Kong  
Xu, Yi, University of Maryland, College Park  
Xu, Zhaoxia, UNSW Australia  
Xu, Zibin, University of Southern California  
Xuan, Yuhai, University of Illinois at Urbana-Champaign  
Xue, Chen, University of Cincinnati  
Xue, Hao, New York University  
Xue, Ling, Georgia State University  
Yafeh, Yishay, Hebrew University  
Yan, Hongjun, Yale University  
Yan, Lu, Indiana University  
Yan, Xuemin (Sterling), University of Missouri  
Yang, Baozhong , Georgia State University  
Yang, Holly, Singapore Management University  
Yang, Jun, Indiana University  
Yang, Liu, National University of Singapore  
Yang, Liu, University of Maryland, College Park  
Yang, Liyan, University of Toronto  
Yang, Luyi, Johns Hopkins University  
Yang, Ming, Duke University  
Yang, Nan, University of Miami  
Yang, Nathan, McGill University  
Yang, S. Alex, London Business School  
Yang, Sha, University of Southern California  
Yang, Yinghui, University of California, Davis  
Yang, Yong, Chinese University of Hong Kong  
Yang, Zhibin (Ben), University of Oregon  
Yao, Dai, National University of Singapore  
Yao, Song, University of Minnesota  
Yasuda, Ayako, University of California, Irvine  
Yavuz, M. Deniz, Purdue University  
Ye, Mao, University of Illinois  
Ye, Minlei, University of Toronto  
Ye, Shengqi, Indiana University  
Ye, Shun, George Mason University  
Yermack, David, New York University  
Yerramilli, Vijay, University of Houston  
Yeung, Andy, The Hong Kong Polytechnic University  
Yeung, Eric, Cornell University  
Yildirim, Pinar, University of Pennsylvania  
Yildizhan, Celim, University of Georgia  
Yilmaz, Bilge, University of Pennsylvania  
Yilmaz, Kamil, Koç University  
Yin, Dezhi, University of Missouri  
Yin, Pai-Ling, Massachusetts Institute of Technology  
Yin, Rui, Arizona State University  
Yin, Shuya, University of California, Irvine  
Yoganarasimhan, Hema, University of Washington-Seattle  
Yonker, Scott, Cornell University  
Yorulmazer, Tanju, University of Amsterdam  
Yost, Benjamin, Massachusetts Institute of Technology  
You, Haifeng, Hong Kong University of Science and Technology  
Young, Peyton, University of Oxford  
Young, Richard, Ohio State University  
Yu, Frank, China Europe International Business School  
Yu, Jianfeng, Tsinghua University  
Yu, Man, Hong Kong University of Science and Technology  
Yu, Peiwen, Fudan University  
Yu, Qiuping, Indiana University  
Yu, Sandy, University of California, Berkeley  
Yu, Xiaoyun, Indiana University  
Yu, Yong, University of Texas at Austin  
Yuan, Yu, Shanghai Jiao Tong University  
Yucel, Safak, Georgetown University  
Yue, Qingyuan(Lori) , University of Southern California  
Yue, Xiaohang, University of Wisconsin  
Yun, Hayong, Michigan State University  
Zach, Tzachi , The Ohio State University  
Zachariadis, Konstantinos, London School of Economics and Political Science  
Zacharias, Christos, University of Miami  
Zaffaroni, Paolo, Imperial College London  
Zakolyukina, Anastasia, University of Chicago  
Zaldokas, Alminas, Hong Kong University of Science and Technology

## 2017 – All Reviewers

Zalmanson, Lior, Tel-Aviv University  
Zaman, Tauhid, Massachusetts Institute of Technology  
Zambrana, Rafael, Universidade Nova de Lisboa  
Zanarone, Giorgio, Colegio Universitario de Estudios Financieros  
Zang, Amy, Hong Kong University of Science and Technology  
Zank, Horst, University of Manchester  
Zantedeschi, Daniel, Ohio State University  
Zapatero, Fernando, University of Southern California  
Zarutskie, Rebecca, Federal Reserve Bank  
Zauberman, Gal, Yale University  
Zawadowski, Adam, Central European University  
Zein, Jason, UNSW Australia  
Zeisberger, Stefan, Radboud Universiteit Faculteit der Managementwetenschappen  
Zelner, Bennet, University of Maryland, College Park  
Zender, Jaime, University of Colorado  
Zeng, Jing, Frankfurt School of Finance & Management  
Zeng, Yao, University of Washington  
Zenteno, Cecilia, Massachusetts General Hospital  
Zentner, Alejandro, University of Texas at Dallas  
Zeppenfeld, Christopher, University of Cologne  
Zervas, Georgios, Boston University  
Zeume, Stefan, University of Michigan--Ann Arbor  
Zhang, Andrew (Jianzhong), University of Nevada, Las Vegas  
Zhang, Anthony, Stanford University  
Zhang, Bohui, University of New South Wales  
Zhang, Dan, University of Colorado at Boulder  
Zhang, Dennis, Washington University in Saint Louis  
Zhang, Donghang, University of South Carolina  
Zhang, Feng, University of Utah  
Zhang, Fuqiang, Washington University in St. Louis  
Zhang, Gaiyan, University of Missouri  
Zhang, Gaoqing, University of Minnesota  
Zhang, Haiwen, Ohio State University  
Zhang, Hanqin, National University of Singapore  
Zhang, Hao, University of British Columbia  
Zhang, Harold, University of Texas at Dallas  
Zhang, Heng, University of Southern California  
Zhang, Hong, Tsinghua University  
Zhang, Huai, Nanyang Technological University  
Zhang, Huanan, University of Michigan  
Zhang, Ivy, University of Minnesota Twin Cities  
Zhang, James, University of Texas at Dallas  
Zhang, Jane, Hong Kong University of Science and Technology  
Zhang, Jiaan, Hong Kong Baptist University  
Zhang, Jie, University of Texas at Arlington  
Zhang, Jieying, University of Texas at Dallas  
Zhang, Jiheng, Hong Kong University of Science and Technology  
Zhang, Jingjing, Indiana University  
Zhang, Kaifu, Carnegie Mellon University  
Zhang, Laurina, Georgia Institute of Technology  
Zhang, Liandong, City University of Hong Kong  
Zhang, Lingling, University of Maryland, College Park  
Zhang, Peter Y., Massachusetts Institute of Technology  
Zhang, Rachel, Hong Kong University of Science and Technology  
Zhang, Renyu, New York University Shanghai  
Zhang, Tianyu, The Chinese University of Hong Kong  
Zhang, Wenrui, Chinese University of Hong Kong  
Zhang, Xiao-Jun, University of California, Berkeley  
Zhang, Xing, Fudan University  
Zhang, Xing, National University of Singapore  
Zhang, Xing, Swiss Federal Institute of Technology in Zurich  
Zhang, Yinghao, University of Cincinnati  
Zhang, Yinglei, Chinese University of Hong Kong  
Zhang, Yuzhao, Rutgers University-Newark  
Zhang, Zhe, Carnegie Mellon University  
Zhang, Zhu, Iowa State University  
Zhao, Feng, University of Texas at Dallas  
Zhao, Minyuan, University of Pennsylvania  
Zhao, Wenhui, Shanghai Jiao Tong University  
Zhdanov, Alexei, Pennsylvania State University  
Zhdanov, Dmitry, University of Connecticut  
Zheng, Fanyin, Columbia University  
Zheng, Jinyang, Purdue University  
Zheng, Kai, University of California, Irvine

## 2017 – All Reviewers

Zheng, Rong, Hong Kong University of Science and Technology

Zheng, Yanchong, Massachusetts Institute of Technology

Zhong, Zachary, University of Toronto

Zhong, Zemin, University of California, Berkeley

Zhong, Zhuo, University of Melbourne

Zhou, Bobby, University of Maryland, College Park

Zhou, Chen, De Nederlandsche Bank NV

Zhou, Dexin, Emory University

Zhou, Guofu, Washington University in St. Louis

Zhou, Hao, Tsinghua University

Zhou, Jidong, Yale University

Zhou, Maggie, University of Michigan

Zhou, Nan, Binghamton University

Zhou, Sean, The Chinese University of Hong Kong

Zhou, Shuang (Frank), University of Pennsylvania

Zhou, Xing, Federal Reserve Board

Zhou, Yibin, University of Texas at Dallas

Zhou, Yong-Pin, University of Washington

Zhu, Feng, Harvard University

Zhu, Haoxiang, Massachusetts Institute of Technology

Zhu, Kaijie, Chinese University of Hong Kong

Zhu, Lingjiong, Florida State University

Zhu, Qifei, University of Texas at Austin

Zhu, Shushang, Sun Yat-Sen University

Zhu, Ting, Purdue University

Zhu, Yi, University of Minnesota

Zhuang, Zili, The Chinese University of Hong Kong

Zia, Bilal, The World Bank

Zimmermann, Florian, University of Zurich

Zinman, Jonathan, Dartmouth College

Ziya, Serhan, University of North Carolina at Chapel Hill

Zoican, Marius, Universite Paris Dauphine

Zoli, Claudio, Universita degli Studi di Verona

Zorc, Sasa, INSEAD Asia Campus

Zou, Youli, The George Washington University

Zubanov, Nikolay, Goethe University Frankfurt

Zubcsek, Peter Pal, Tel Aviv University

Zubizarretta, Jose, Harvard University

Zultan, Ro'i, Ben-Gurion University of the Negev

Zuo, Luo, Cornell University

Zur, Emanuel, University of Maryland, College Park

Zviadadze, Irina, Stockholm School of Economics

Zwick, Rami, University of California, Riverside
